# Supplementary material for: Pharmacogenomic Analyses Implicate B Cell Developmental Status and MKL1 as Determinants of Sensitivity toward Anti-CD20 Monoclonal Antibody Therapy
Source: MDPI journal article supplement (doi:10.3390/cells12121574), 2023-06-07
Supplement: s1 [file s1]

**Table S3: Gene list for supervised gene expression analysis**

| Ensembl ID         | gene name | Ensembl ID        | gene name | Ensembl ID      | gene name |
|--------------------|-----------|-------------------|-----------|-----------------|-----------|
| ENSG00000183044    | ABAT      | ENSG00000070831   | CDC42     | ENSG00000196092 | PAX5      |
| ENSG00000154262    | ABCA6     | ENSG00000111666   | CHPT1     | ENSG00000143393 | PI4KB     |
| ENSG00000097021    | ACOT7     | ENSG00000141367   | CLTC      | ENSG00000105647 | PIK3R2    |
| ENSG00000124942    | AHNAK     | ENSG00000091317   | CMTM6     | ENSG00000127838 | PNKD      |
| ENSG00000111732    | AICDA     | ENSG00000055130   | CUL1      | ENSG00000105171 | POP4      |
| ENSG00000111732    | AICDA     | ENSG00000107562   | CXCL12    | ENSG00000184271 | POU6F1    |
| ENSG00000155085    | AK9       | ENSG00000205795   | CYS1      | ENSG00000135362 | PRR5L     |
| ENSG00000135046    | anxa11    | ENSG00000184545   | DUSP8     | ENSG00000135069 | PSAT1     |
| ENSG00000122359    | ANXA11    | ENSG00000004478   | FKBP4     | ENSG00000125637 | PSD4      |
| ENSG00000182718    | ANXA2     | ENSG00000070404   | FSTL3     | ENSG00000144566 | RAB5A     |
| ENSG00000164111    | ANXA5     | ENSG00000139112   | GABARAPL1 | ENSG00000113522 | RAD50     |
| ENSG00000197043    | ANXA6     | ENSG00000178234   | GALNT11   | ENSG00000197747 | S100A10   |
| ENSG00000138279    | ANXA7     | ENSG00000139436   | GIT2      | ENSG00000163191 | S100A11   |
| ENSG00000134982    | APC       | ENSG00000139436   | GIT2      | ENSG00000155307 | SAMSN1    |
| ENSG00000143761    | ARF1      | ENSG00000204257.8 | HLA-DMA   | ENSG00000103496 | SCAMP5    |
| ENSG00000029153    | ARNTL2    | ENSG00000242574.3 | HLA-DMB   | ENSG00000138468 | SENPF     |
| ENSG00000095585    | BLNK      | ENSG00000241106.2 | HLA-DOB   | ENSG00000163082 | SGPP2     |
| ENSG00000163689    | C3orf67   | ENSG00000223865.4 | HLA-DPB1  | ENSG00000160584 | SIK3      |
| ENSG00000134072    | CAMK1     | ENSG00000196735.6 | HLA-DQA1  | ENSG00000108854 | SMURF2    |
| ENSG00000014216    | CAPN1     | ENSG00000196126.6 | HLA-DRB1  | ENSG00000198369 | SPRED2    |
| ENSG00000162909    | CAPN2     | ENSG00000211898   | IGHD      | ENSG00000128578 | STRIP2    |
| ENSG00000092529    | CAPN3     | ENSG00000211896   | IGHG1     | ENSG00000135604 | STX11     |
| ENSG00000130940    | CASZ1     | ENSG00000211893   | IGHG2     | ENSG00000099365 | STX1B     |
| ENSG00000105974    | CAV1      | ENSG00000211897   | IGHG3     | ENSG00000111450 | STX2      |
| ENSG00000114423    | CBLB      | ENSG00000211899   | IGHM      | ENSG00000166900 | STX3      |
| ENSG00000119242    | CCDC92    | ENSG00000211943.2 | IGHV3-15  | ENSG00000103496 | STX4      |
| ENSG00000102970    | CCL17     | ENSG00000211967.2 | IGHV3-53  | ENSG00000079950 | STX7      |
| ENSG00000151882    | CCL28     | ENSG00000211966.2 | IGHV5-51  | ENSG00000170310 | STX8      |
| ENSG00000151882    | CCL28     | ENSG00000243238.1 | IGKV2-30  | ENSG00000076944 | STXBP2    |
| ENSG00000150637    | CD226     | ENSG00000242534.2 | IGKV2D-28 | ENSG00000106799 | TGFBR1    |
| ENSG00000139193    | CD27      | ENSG00000239571.1 | IGKV2D-30 | ENSG00000120949 | TNFRSF8   |
| ENSG00000004468    | CD38      | ENSG00000253818.1 | IGLV1-41  | ENSG00000167460 | TPM4      |
| ENSG00000101017    | CD40      | ENSG00000211668.2 | IGLV2-11  | ENSG00000104447 | TRPS1     |
| ENSG00000026508    | CD44      | ENSG00000211664.2 | IGLV2-18  | ENSG00000074319 | TSG101    |
| ENSG00000026508    | CD44      | ENSG00000211659.2 | IGLV3-25  | ENSG00000074319 | TSG101    |
| ENSG00000117335    | CD46      | ENSG00000134460   | IL2RA     | ENSG00000111647 | UHRF1BP1L |
| ENSG00000196352    | CD55      | ENSG00000152969   | JAKMIP1   | ENSG00000118640 | VAMP8     |
| ENSG00000085063    | CD59      | ENSG00000185896   | LAMP1     | ENSG00000131475 | VPS25     |
| ENSG00000110848    | CD69      | ENSG00000156738   | MS4A1     | ENSG00000160948 | VPS28     |
| ENSG00000019582.10 | CD74      | ENSG00000118513   | MYB       | ENSG00000136100 | VPS36     |

|                 |       |                 |       |                 |         |
|-----------------|-------|-----------------|-------|-----------------|---------|
| ENSG00000105369 | CD79A | ENSG00000157483 | MYO1E | ENSG00000115085 | ZAP70   |
| ENSG00000007312 | CD79B | ENSG00000167306 | MYO5B | ENSG00000175893 | ZDHHC21 |
| ENSG00000114013 | CD86  | ENSG00000113580 | NR3C1 | ENSG00000075292 | ZNF638  |
| ENSG00000010278 | CD9   | ENSG00000198836 | OPA1  | ENSG00000198146 | ZNF770  |
