# Supplementary material for: Pharmacogenomic Analyses Implicate B Cell Developmental Status and MKL1 as Determinants of Sensitivity toward Anti-CD20 Monoclonal Antibody Therapy
Source: MDPI journal article supplement (doi:10.3390/cells12121574), 2023-06-07
Supplement: s1 [file s1]

**Table S1:** List of primers used for qPCR

| Gene/primer name     | Sequence                  |
|----------------------|---------------------------|
| CD20 for             | GAGCCAATGAAAGGCCCTATT     |
| CD20 rev             | TGCTGCCAGGAGTGATCCGGAA    |
| CD23 for             | GGTATGCCTGTGACGACATGGA    |
| CD23 rev             | TTCAGGTCCAAGTTCCGAAGGC    |
| CD40 for             | CCTGTTTGCCATCCTCTTGGTG    |
| CD40 rev             | AGCAGTGTTGGAGCCAGGAAGA    |
| CD69 for             | GCTGGACTTCAGCCCAAATGC     |
| CD69 rev             | AGTCCAACCCAGTGTTCTCTC     |
| GAPDH for            | CTTTTGCGTCGCCAG           |
| GAPDH rev            | TTGATGGCAACAATATCCAC      |
| J-region for (IgM/G) | MYGGTCACYGTCTCYTCAG       |
| IGG rev              | AAGACCGATGGGCCCTTG        |
| IgM rev              | GGGAATTCTCACAGGAGACG      |
| IRF4 for             | GAACGAGGAGAAGAGCATCTTCC   |
| IRF4 rev             | CGATGCCTTCTCGGAACCTTCC    |
| MKL1 11-12 for       | CAGAACAGCACCTCACTGACTG    |
| MKL1 11-12 rev       | CAGGCAGTGATCGCAACTCAG     |
| MKL1 13-14 for       | CAGCAGCCCAAACAGCAGG       |
| MKL1 13-14 var rev   | GAAATTTCTGGGTTACCTCCG     |
| MKL1 13-14 wt rev    | CTGCTGAAATTTCTCCGCTCTG    |
| PAX5 for             | CTTGCTCATCAAGGTGTCAGGC    |
| PAX5 rev             | TGGCGACCTTTGGTTTGGATCC    |
| TNFRSF17 for         | TCTTTGGCAGTTTTCTGTGCTAATG |
| TNFRSF17 rev         | TTCTGCTCTCCTGAAGCCACCT    |
| CD20 for             | GAGCCAATGAAAGGCCCTATT     |
| CD20 rev             | TGCTGCCAGGAGTGATCCGGAA    |
