# Supplementary material for: Pharmacogenomic Analyses Implicate B Cell Developmental Status and MKL1 as Determinants of Sensitivity toward Anti-CD20 Monoclonal Antibody Therapy
Source: MDPI journal article supplement (doi:10.3390/cells12121574), 2023-06-07
Supplement: s1 [file s1]

**Table S4 : Supervised gene expression analysis results for ofatumumab+complement**

Results are shown where the corrected p-value is less than 0.05

| Gene ID         |           | p value |
|-----------------|-----------|---------|
| ENSG00000196352 | CD55      | 0.004   |
| ENSG00000139112 | GABARAPL1 | 0.005   |
| ENSG00000160584 | SIK3      | 0.017   |
| ENSG00000204257 | HLA-DMA   | 0.029   |
| ENSG00000242574 | HLA-DMB   | 0.031   |
| ENSG00000205795 | CYS1      | 0.044   |
| ENSG00000196126 | HLA-DRB1  | 0.044   |
| ENSG00000091317 | CMTM6     | 0.044   |
| ENSG00000198794 | SCAMP5    | 0.044   |
| ENSG00000111450 | STX2      | 0.046   |
| ENSG00000167306 | MYO5B     | 0.048   |
| ENSG00000019582 | CD74      | 0.048   |
