# Supplementary material for: Pharmacogenomic Analyses Implicate B Cell Developmental Status and MKL1 as Determinants of Sensitivity toward Anti-CD20 Monoclonal Antibody Therapy
Source: MDPI journal article supplement (doi:10.3390/cells12121574), 2023-06-07
Supplement: s1 [file s1]

**Table S2: Gene expression levels that are significantly correlated with sensitivity.**

The significant gene results ( $p < 0.05$ , corrected Bonferroni  $p$ -value) are shown for each respective antibody in bold. The  $p$ -value is also shown when  $p > 0.05$  to 0.25 if  $p$  is  $< 0.05$  for another antibody. Data is sorted based on drug then level of significance.

|                     | Ensembl ID         | gene name         | ofat<br>p-value<br>n=221 | obin<br>p-value<br>n=8 | rtx<br>p-value<br>n=2 |
|---------------------|--------------------|-------------------|--------------------------|------------------------|-----------------------|
| <b>rituximab</b>    | ENSG00000151079.6  | KCNA6             | 0.0103                   | 0.1672                 | <b>0.0372</b>         |
|                     | ENSG00000102870.4  | ZNF629            | 0.0016                   | 0.1877                 | <b>0.0372</b>         |
| <b>obinutuzumab</b> | ENSG00000146416.10 | AIG1              | 0.0103                   | <b>0.0016</b>          | ---                   |
|                     | ENSG00000018408.10 | WWTR1             | 0.0436                   | <b>0.0102</b>          | ---                   |
|                     | ENSG00000223478.1  | RP11-545E17.3     | 0.0033                   | <b>0.0102</b>          | ---                   |
|                     | ENSG00000261609.1  | GAN               | 0.0072                   | <b>0.0102</b>          | ---                   |
|                     | ENSG00000223886.3  | RP11-251G23.2     | 0.1485                   | <b>0.0184</b>          | ---                   |
|                     | ENSG00000196083.5  | IL1RAP            | 0.0084                   | <b>0.0184</b>          | ---                   |
|                     | ENSG00000136444.5  | RSAD1             | 0.0698                   | <b>0.0184</b>          | ---                   |
|                     | ENSG00000150593.11 | PDCD4             | 0.2059                   | <b>0.0388</b>          | ---                   |
| <b>ofatumumab</b>   | ENSG00000140682.14 | <b>TGFB1I1</b>    | <b>0.0003</b>            | ---                    | ---                   |
|                     | ENSG00000102870.4  | ZNF629            | <b>0.0016</b>            | 0.1877                 | 0.0372                |
|                     | ENSG00000262026.1  | ENSG00000262026.1 | <b>0.0017</b>            | 0.2180                 | 0.0757                |
|                     | ENSG00000075234.12 | WSB2              | <b>0.0025</b>            | ---                    | ---                   |
|                     | ENSG00000145936.3  | KCNMB1            | <b>0.0025</b>            | 0.1620                 | ---                   |
|                     | ENSG00000141391.8  | PRELID3A          | <b>0.0025</b>            | ---                    | ---                   |
|                     | ENSG00000160233.5  | LRRC3             | <b>0.0025</b>            | 0.2323                 | 0.2059                |
|                     | ENSG00000155254.7  | MARVELD1          | <b>0.0025</b>            | 0.1240                 | ---                   |
|                     | ENSG00000176871.4  | RP11-545E17.3     | <b>0.0033</b>            | 0.0102                 | ---                   |
|                     | ENSG00000188290.6  | HES4              | <b>0.0039</b>            | ---                    | ---                   |
|                     | ENSG00000102996.4  | MMP15             | <b>0.0042</b>            | ---                    | ---                   |
|                     | ENSG00000102931.3  | ARL2BP            | <b>0.0069</b>            | ---                    | ---                   |
|                     | ENSG00000223478.1  | FCMR              | <b>0.0072</b>            | 0.2198                 | ---                   |
|                     | ENSG00000146416.10 | DPF3              | <b>0.0072</b>            | ---                    | ---                   |
|                     | ENSG00000241399.2  | CD302             | <b>0.0072</b>            | 0.0941                 | ---                   |
|                     | ENSG00000143878.8  | RHOB              | <b>0.0072</b>            | ---                    | ---                   |
|                     | ENSG00000261609.1  | GAN               | <b>0.0072</b>            | 0.0102                 | ---                   |
|                     | ENSG00000110080.13 | ST3GAL4           | <b>0.0072</b>            | ---                    | ---                   |
|                     | ENSG00000188997.3  | KCTD21            | <b>0.0084</b>            |                        |                       |
|                     | ENSG00000082781.6  | GNAS              | <b>0.0084</b>            |                        |                       |
|                     | ENSG00000186314.7  | PRELID2           | <b>0.0084</b>            |                        |                       |
|                     | ENSG00000168026.11 | TTC21A            | <b>0.0084</b>            | 0.2050                 |                       |
|                     | ENSG00000181649.5  | PHLDA2            | <b>0.0084</b>            |                        |                       |
|                     | ENSG00000196083.5  | IL1RAP            | <b>0.0084</b>            | 0.0184                 |                       |

|                    |                   |        |        |        |
|--------------------|-------------------|--------|--------|--------|
| ENSG00000178773.10 | CPNE7             | 0.0084 | 0.2353 |        |
| ENSG00000110237.3  | ARHGEF17          | 0.0084 |        |        |
| ENSG00000107738.12 | C10orf54          | 0.0085 | 0.1786 |        |
| ENSG00000171368.10 | TPPP              | 0.0089 | 0.2353 |        |
| ENSG00000120029.7  | C10orf76          | 0.0093 |        |        |
| ENSG00000224407.1  | RP5-956O18.3      | 0.0093 |        |        |
| ENSG00000198682.7  | PAPSS2            | 0.0093 | 0.2435 |        |
| ENSG00000114853.8  | ZBTB47            | 0.0096 |        |        |
| ENSG00000170634.7  | AIG1              | 0.0103 | 0.0016 |        |
| ENSG00000162894.7  | SERPINA1          | 0.0103 | 0.2300 | 0.1211 |
| ENSG00000108771.6  | DHX58             | 0.0103 |        |        |
| ENSG00000132205.5  | EMILIN2           | 0.0103 |        |        |
| ENSG00000151079.6  | KCNA6             | 0.0103 | 0.1672 | 0.0372 |
| ENSG00000198003.5  | CCDC151           | 0.0103 |        |        |
| ENSG00000136040.4  | RP1-148H17.1      | 0.0104 |        |        |
| ENSG00000227677.1  | ENSG00000227677.1 | 0.0104 |        |        |
| ENSG00000179431.5  | FJX1              | 0.0104 |        |        |
| ENSG00000087460.15 | ACYP2             | 0.0115 |        |        |
| ENSG00000196352.8  | CD55              | 0.0115 |        |        |
| ENSG00000164683.11 | HEY1              | 0.0115 |        |        |
| ENSG00000197249.8  | CYB561A3          | 0.0119 |        |        |
| ENSG00000165233.13 | CARD19            | 0.0119 |        |        |
| ENSG00000143641.7  | GALNT2            | 0.0119 |        |        |
| ENSG00000136997.9  | MYC               | 0.0119 |        |        |
| ENSG00000160285.9  | LSS               | 0.0121 |        |        |
| ENSG00000162144.4  | SLC6A4            | 0.0128 |        |        |
| ENSG00000197077.7  | TRIM32            | 0.0138 |        |        |
| ENSG00000246082.2  | NUDT16P1          | 0.0138 |        |        |
| ENSG00000149591.11 | TAGLN             | 0.0144 | 0.1187 |        |
| ENSG00000164086.8  | DUSP7             | 0.0144 |        |        |
| ENSG00000139112.6  | PLXNC1            | 0.0144 |        |        |
| ENSG00000108576.4  | KIAA1671          | 0.0144 |        |        |
| ENSG00000104388.9  | RAB2A             | 0.0144 |        |        |
| ENSG00000010803.12 | SCMH1             | 0.0146 |        |        |
| ENSG00000182022.12 | CHST15            | 0.0152 |        |        |
| ENSG00000138002.10 | IFT172            | 0.0152 |        |        |
| ENSG00000120896.9  | SORBS3            | 0.0155 |        |        |
| ENSG00000076706.7  | MCAM              | 0.0155 |        |        |
| ENSG00000178403.3  | NEUROG2           | 0.0156 |        |        |
| ENSG00000137177.13 | KIF13A            | 0.0158 |        |        |
| ENSG00000119401.9  | ADO               | 0.0170 |        |        |
| ENSG00000197355.6  | UAP1L1            | 0.0170 |        |        |
| ENSG00000096433.5  | ITPR3             | 0.0170 |        |        |

|                    |                   |        |        |  |
|--------------------|-------------------|--------|--------|--|
| ENSG00000205683.5  | GABARAPL1         | 0.0177 |        |  |
| ENSG00000187824.3  | TMEM220           | 0.0177 |        |  |
| ENSG00000237513.1  | RP11-325F22.2     | 0.0177 |        |  |
| ENSG00000176014.6  | TUBB6             | 0.0186 |        |  |
| ENSG00000082146.6  | ITGB5             | 0.0194 |        |  |
| ENSG00000181915.3  | TK2               | 0.0202 |        |  |
| ENSG00000257607.1  | RP11-449P15.1     | 0.0202 |        |  |
| ENSG00000171813.10 | PWWP2B            | 0.0202 |        |  |
| ENSG00000143537.8  | ADAM15            | 0.0202 |        |  |
| ENSG00000114993.11 | RTKN              | 0.0202 |        |  |
| ENSG00000170190.10 | SLC16A5           | 0.0202 |        |  |
| ENSG00000165912.10 | PACSIN3           | 0.0202 |        |  |
| ENSG00000163132.6  | MSX1              | 0.0202 |        |  |
| ENSG00000177096.4  | FAM109B           | 0.0203 |        |  |
| ENSG00000197701.7  | ENSG00000197701.7 | 0.0206 |        |  |
| ENSG00000158747.9  | NBL1              | 0.0206 |        |  |
| ENSG00000106624.4  | AEBP1             | 0.0209 |        |  |
| ENSG00000144283.15 | PKP4              | 0.0209 |        |  |
| ENSG00000224565.1  | PRKACA            | 0.0213 |        |  |
| ENSG00000100311.12 | PDGFB             | 0.0215 |        |  |
| ENSG00000166311.5  | STRADB            | 0.0231 |        |  |
| ENSG00000131037.8  | EPS8L1            | 0.0236 |        |  |
| ENSG00000184014.3  | GPS2              | 0.0244 |        |  |
| ENSG00000172716.11 | SLFN11            | 0.0246 |        |  |
| ENSG00000142733.8  | MAP3K6            | 0.0246 |        |  |
| ENSG00000115107.14 | STEAP3            | 0.0246 |        |  |
| ENSG00000072062.7  | FHL2              | 0.0257 | 0.1016 |  |
| ENSG00000235105.1  | UBE2Q1            | 0.0257 | 0.0609 |  |
| ENSG00000160584.11 | RAB11FIP1         | 0.0257 |        |  |
| ENSG00000132522.10 | BCAR3             | 0.0257 |        |  |
| ENSG00000129195.9  | FAM64A            | 0.0257 |        |  |
| ENSG00000128917.5  | DLL4              | 0.0257 |        |  |
| ENSG00000118257.11 | NRP2              | 0.0257 | 0.0609 |  |
| ENSG00000188157.8  | AGRN              | 0.0257 |        |  |
| ENSG00000020577.9  | SAMD4A            | 0.0257 |        |  |
| ENSG00000139832.3  | RAB20             | 0.0257 |        |  |
| ENSG00000205277.5  | MUC12             | 0.0257 |        |  |
| ENSG00000177425.6  | PAWR              | 0.0257 |        |  |
| ENSG00000105186.7  | ANKRD27           | 0.0257 |        |  |
| ENSG00000157782.5  | CABP1             | 0.0260 |        |  |
| ENSG00000213205.3  | RCAN1             | 0.0261 |        |  |
| ENSG00000168916.10 | TP73              | 0.0269 |        |  |
| ENSG00000167771.5  | RCOR2             | 0.0271 |        |  |

|                    |                   |        |        |  |
|--------------------|-------------------|--------|--------|--|
| ENSG00000160447.6  | PKN3              | 0.0271 |        |  |
| ENSG00000187678.7  | SPRY4             | 0.0274 |        |  |
| ENSG00000250073.2  | RP11-677M14.3     | 0.0274 |        |  |
| ENSG00000116132.7  | PRRX1             | 0.0274 |        |  |
| ENSG00000092621.6  | PHGDH             | 0.0274 |        |  |
| ENSG00000139926.11 | RP11-329A14.1     | 0.0283 |        |  |
| ENSG00000240024.1  | SMPD1             | 0.0285 |        |  |
| ENSG00000153395.5  | LPCAT1            | 0.0285 |        |  |
| ENSG00000198598.2  | MMP17             | 0.0285 |        |  |
| ENSG00000213362.3  | FTH1P12           | 0.0285 |        |  |
| ENSG00000138463.8  | PRSS16            | 0.0286 |        |  |
| ENSG00000166548.10 | ZNF658B           | 0.0286 |        |  |
| ENSG00000142102.11 | PGGHG             | 0.0286 |        |  |
| ENSG00000074660.11 | SCARF1            | 0.0286 |        |  |
| ENSG00000149564.7  | ESAM              | 0.0286 |        |  |
| ENSG00000004399.8  | PLXND1            | 0.0288 |        |  |
| ENSG00000101670.5  | LIPG              | 0.0295 |        |  |
| ENSG00000100968.9  | NFATC4            | 0.0295 |        |  |
| ENSG00000115641.13 | ENSG00000198566.7 | 0.0302 |        |  |
| ENSG00000140854.8  | KATNB1            | 0.0302 |        |  |
| ENSG00000141401.6  | IMPA2             | 0.0302 |        |  |
| ENSG00000124006.8  | OBSL1             | 0.0315 |        |  |
| ENSG00000100344.6  | PNPLA3            | 0.0328 |        |  |
| ENSG00000079263.11 | FCRL3             | 0.0330 |        |  |
| ENSG00000136098.10 | NEK3              | 0.0330 |        |  |
| ENSG00000253276.1  | DENND5A           | 0.0333 |        |  |
| ENSG00000078900.9  | RPS4XP16          | 0.0333 | 0.0856 |  |
| ENSG00000198873.8  | GRK5              | 0.0333 | 0.0923 |  |
| ENSG00000176659.5  | C20orf197         | 0.0333 |        |  |
| ENSG00000224892.1  | ITGAX             | 0.0337 |        |  |
| ENSG00000170412.11 | GPRC5C            | 0.0342 |        |  |
| ENSG00000009790.9  | APLF              | 0.0343 |        |  |
| ENSG00000159200.12 | IL24              | 0.0343 |        |  |
| ENSG00000261658.1  | ENSG00000261658.1 | 0.0343 |        |  |
| ENSG00000056661.8  | ENSG00000056661.8 | 0.0343 |        |  |
| ENSG00000136010.9  | ALDH1L2           | 0.0344 |        |  |
| ENSG00000197905.4  | TEAD4             | 0.0352 |        |  |
| ENSG00000169418.7  | NPR1              | 0.0358 |        |  |
| ENSG00000105655.10 | ISYNA1            | 0.0374 |        |  |
| ENSG00000230055.1  | ENSG00000230055.1 | 0.0377 |        |  |
| ENSG00000253228.1  | SIK3              | 0.0387 |        |  |
| ENSG00000162692.5  | LINC00888         | 0.0387 |        |  |
| ENSG00000160714.5  | TRAF3IP3          | 0.0387 |        |  |

|                    |                   |        |        |        |
|--------------------|-------------------|--------|--------|--------|
| ENSG00000140678.12 | CMTM1             | 0.0387 |        |        |
| ENSG00000130477.9  | UNC13A            | 0.0387 |        |        |
| ENSG00000148180.9  | GSN               | 0.0387 |        |        |
| ENSG00000131584.13 | ACAP3             | 0.0387 | 0.0746 |        |
| ENSG00000105514.2  | RAB3D             | 0.0387 |        |        |
| ENSG00000128408.7  | RIBC2             | 0.0387 |        |        |
| ENSG00000008256.11 | CYTH3             | 0.0387 | 0.0609 |        |
| ENSG00000147454.8  | SLC25A37          | 0.0387 |        |        |
| ENSG00000018408.10 | SP140             | 0.0393 |        |        |
| ENSG00000143420.12 | STRADBP1          | 0.0393 |        |        |
| ENSG00000163947.7  | CAMP              | 0.0393 |        |        |
| ENSG00000158106.8  | RHPN1             | 0.0393 |        |        |
| ENSG00000169621.5  | TTC38             | 0.0395 |        |        |
| ENSG00000132434.5  | NRBF2P4           | 0.0396 |        |        |
| ENSG00000178814.11 | OPLAH             | 0.0396 |        |        |
| ENSG00000254102.1  | RP11-21C4.1       | 0.0399 |        |        |
| ENSG00000162892.11 | VCAM1             | 0.0409 |        |        |
| ENSG00000064651.9  | SLC12A2           | 0.0409 |        |        |
| ENSG00000068383.12 | INPP5A            | 0.0409 |        |        |
| ENSG00000162714.7  | ZNF496            | 0.0422 |        |        |
| ENSG00000213523.4  | DIRC2             | 0.0427 |        |        |
| ENSG00000087903.7  | RFX2              | 0.0427 |        |        |
| ENSG00000198093.5  | ZNF649            | 0.0427 | 0.1014 | 0.2059 |
| ENSG00000154760.9  | SLFN13            | 0.0427 |        |        |
| ENSG00000112812.10 | WWTR1             | 0.0436 |        |        |
| ENSG00000105613.3  | MAST1             | 0.0436 |        |        |
| ENSG00000043462.7  | LCP2              | 0.0436 |        |        |
| ENSG00000249509.1  | RP11-402J6.1      | 0.0436 |        |        |
| ENSG00000156675.10 | CCDC71L           | 0.0438 |        |        |
| ENSG00000137936.11 | ENSA              | 0.0439 |        |        |
| ENSG00000165646.7  | SLC18A2           | 0.0439 |        |        |
| ENSG00000196155.7  | PLEKHG4           | 0.0439 |        |        |
| ENSG00000067182.3  | TNFRSF1A          | 0.0440 |        |        |
| ENSG00000112144.11 | ICK               | 0.0440 |        |        |
| ENSG00000160961.6  | ZNF333            | 0.0440 |        |        |
| ENSG00000260528.1  | FAM157C           | 0.0440 |        |        |
| ENSG00000196267.6  | ZNF836            | 0.0440 |        |        |
| ENSG00000004660.10 | CAMKK1            | 0.0444 |        |        |
| ENSG00000115756.8  | HPCAL1            | 0.0447 |        |        |
| ENSG00000089505.12 | LANCL2            | 0.0449 |        |        |
| ENSG00000102471.9  | SRA1              | 0.0449 |        |        |
| ENSG00000140368.8  | PSTPIP1           | 0.0449 |        |        |
| ENSG00000236233.2  | ENSG00000236233.2 | 0.0449 |        |        |

|                    |                   |        |        |  |
|--------------------|-------------------|--------|--------|--|
| ENSG00000164849.6  | GPR146            | 0.0449 |        |  |
| ENSG00000187961.7  | KLHL17            | 0.0449 |        |  |
| ENSG00000179818.6  | PCBP1-AS1         | 0.0449 |        |  |
| ENSG00000237198.2  | ENSG00000237198.2 | 0.0452 |        |  |
| ENSG00000198416.7  | ZNF608            | 0.0452 |        |  |
| ENSG00000160856.14 | FRMD6             | 0.0452 |        |  |
| ENSG00000127418.9  | FGFRL1            | 0.0454 |        |  |
| ENSG00000109062.4  | SLC9A3R1          | 0.0456 |        |  |
| ENSG00000198566.7  | ARHGEF3           | 0.0459 |        |  |
| ENSG00000164047.3  | IRF6              | 0.0462 |        |  |
| ENSG00000162572.14 | SCNN1D            | 0.0466 |        |  |
| ENSG00000134504.7  | NDFIP2            | 0.0470 |        |  |
| ENSG00000117595.6  | BORCS5            | 0.0473 |        |  |
| ENSG00000110328.5  | GALNT18           | 0.0473 |        |  |
| ENSG00000138080.8  | EMILIN1           | 0.0483 |        |  |
| ENSG00000086288.7  | ENSG00000196409.6 | 0.0487 |        |  |
| ENSG00000165714.6  | KCTD1             | 0.0488 |        |  |
| ENSG00000259820.1  | AC083843.1        | 0.0489 |        |  |
| ENSG00000198429.5  | ZNF69             | 0.0494 |        |  |
| ENSG00000196409.6  | NME8              | 0.0497 |        |  |
| ENSG00000158270.9  | COLEC12           | 0.0497 |        |  |
| ENSG00000089091.10 | DZANK1            | 0.0497 |        |  |
| ENSG00000237493.2  | RP11-603J24.7     | 0.0499 |        |  |
| ENSG00000100979.10 | PLTP              | 0.0499 |        |  |
| ENSG00000206082.4  | ENSG00000206082.4 | 0.0499 | 0.0746 |  |
