# Supplementary material for: Pharmacogenomic Analyses Implicate B Cell Developmental Status and MKL1 as Determinants of Sensitivity toward Anti-CD20 Monoclonal Antibody Therapy
Source: MDPI journal article supplement (doi:10.3390/cells12121574), 2023-06-07
Supplement: s1 [file s1]

**Table S2:** Table summarizing viability results. A) Descriptive statistics summary of the viability data for the population of cells for each antibody: Rituximab (Rtx); Ofatumumab (Ofat); and Obinutuzumab (Obin). The correlation coefficient comparing viability data of pairs of antibodies is shown as  $R^2$ . B) The average viability for each individual cell line is shown. Response to antibody was assayed under normal media conditions (media) or in the presence of human serum as a complement source. Viability is expressed relative to samples without antibody. Each cell line was assayed twice as quadruplicates.

**A)**

| Complement present | Antibody     | Minimum viability | Maximum viability | Median viability | Rtx $R^2$ | Ofat $R^2$ | Obin $R^2$ |
|--------------------|--------------|-------------------|-------------------|------------------|-----------|------------|------------|
| +                  | Rituximab    | 11%               | 123%              | 64%              | 1.00      | 0.45       | 0.24       |
| +                  | Ofatumumab   | 0%                | 129%              | 60%              | 0.45      | 1.00       | 0.44       |
| +                  | Obinutuzumab | 0%                | 75%               | 37%              | 0.24      | 0.44       | 1.00       |
| -                  | Ofatumumab   | 41%               | 102%              | 62%              | n/a       | 1.00       | 0.52       |
| -                  | Obinutuzumab | 38%               | 101%              | 64%              | n/a       | 0.52       | 1.00       |

**B)**

| Cell ID (GM:) | Obin_media  | Obin_serum  | Ofat_media  | Ofat_serum  | Ritux_serum |
|---------------|-------------|-------------|-------------|-------------|-------------|
| 1112          | 0.682440704 | 0.432766615 | 0.737987758 | 0.805512622 | 0.854456466 |
| 1113          | 0.508259046 | 0.313378131 | 0.687532774 | 0.6212584   | 0.77275504  |
| 1124          | 0.5066357   | 0.203319502 | 0.582559168 | 0.090693539 | 0.276822762 |
| 1125          | 0.62332612  | 0.540250772 | 0.700473547 | 0.757223333 | 0.799563874 |
| 1133          | 0.640601314 | 0.429391504 | 0.528928752 | 0.619402985 | 0.690357676 |
| 1134          | 0.595328002 | 0.265313849 | 0.666000296 | 0.5158628   | 0.849776634 |
| 1136          | 0.634113274 | 0.44552152  | 0.611677236 | 0.474602559 | 0.686312524 |
| 1137          | 0.694130195 | 0.499042757 | 0.698510646 | 0.67368645  | 0.763880026 |
| 1139          | 0.551475127 | 0.387024609 | 0.513825454 | 0.63310962  | 0.68158091  |
| 1140          | 0.630931857 | 0.662763827 | 0.610924598 | 0.634570944 | 0.688183639 |
| 1148          | 0.642589482 | 0.284675615 | 0.606882888 | 0.465324385 | 0.533557047 |
| 1149          | 0.683605202 | 0.621212121 | 0.577989927 | 0.856506239 | 0.896613191 |
| 1250          | 0.606759928 | 0.499777558 | 0.600201776 | 0.68445037  | 0.739531043 |
| 1251          | 0.521298966 | 0.267019018 | 0.56070325  | 0.598429815 | 0.584120992 |
| 1253          | 0.555873629 | 0.289280745 | 0.535106527 | 0.514549655 | 0.752287324 |
| 1254          | 0.740443605 | 0.593521279 | 0.672681342 | 0.819192193 | 0.998915695 |
| 1256          | 0.652086395 | 0.584076515 | 0.774298677 | 0.672353625 | 0.831846969 |
| 1257          | 0.593919134 | 0.233698239 | 0.536731933 | 0.376963351 | 0.510709186 |
| 1259          | 0.494455764 | 0.264710456 | 0.469034704 | 0.268240653 | 0.62075601  |
| 1260          | 0.540846158 | 0.309059633 | 0.651773402 | 0.604357798 | 0.611238532 |
| 1271          | 0.563931824 | 0.297357815 | 0.584253381 | 0.657113002 | 0.683833408 |
| 1272          | 0.563669538 | 0.497165722 | 0.606568507 | 0.822607536 | 0.854951651 |
| 1274          | 0.646323492 | 0.354819633 | 0.565984044 | 0.57717327  | 0.909520993 |

|      |             |             |             |             |             |
|------|-------------|-------------|-------------|-------------|-------------|
| 1275 | 0.586570561 | 0.452101859 | 0.618007081 | 0.498585287 | 0.549919159 |
| 1277 | 0.639100577 | 0.559879032 | 0.637390977 | 0.808266129 | 0.839919355 |
| 1278 | 0.621119538 | 0.560028001 | 0.534301192 | 0.663633182 | 0.734686734 |
| 1334 | 0.540451161 | 0.421070772 | 0.651489269 | 0.634306066 | 0.637178309 |
| 1341 | 0.669454802 | 0.479778877 | 0.638751722 | 0.611143439 | 0.644748327 |
| 1342 | 0.732363197 | 0.359499431 | 0.641630901 | 0.489761092 | 0.606939704 |
| 1344 | 0.655651585 | 0.58928945  | 0.795305544 | 1.161495014 | 0.713269646 |
| 1345 | 0.621821492 | 0.396398058 | 0.650833381 | 0.721187535 | 0.730591923 |
| 1347 | 0.584672509 | 0.388541232 | 0.701975345 | 0.605803551 | 0.689194827 |
| 1348 | 0.686783424 | 0.598903043 | 0.726595992 | 0.773531493 | 0.751061571 |
| 1350 | 0.600608316 | 0.588027592 | 0.557506285 | 0.702628386 | 0.729735365 |
| 1351 | 0.595697207 | 0.205643233 | 0.571098011 | 0.378766141 | 0.390881556 |
| 1353 | 0.70318622  | 0.553039939 | 0.68274562  | 0.645637242 | 0.703044179 |
| 1354 | 0.64528426  | 0.612036797 | 0.620342894 | 0.601501055 | 1.094821678 |
| 1356 | 0.58251634  | 0.28440367  | 0.557880845 | 0.346788991 | 0.478899083 |
| 1357 | 0.553170116 | 0.252709641 | 0.706839643 | 0.479178551 | 0.663148888 |
| 1359 | 0.664848659 | 0.311640415 | 0.510222307 | 0.577871687 | 0.581559739 |
| 1360 | 0.557651715 | 0.359303391 | 0.534432718 | 0.721356554 | 0.760769936 |
| 1365 | 0.575164398 | 0.263880597 | 0.530458276 | 0.621492537 | 0.620895522 |
| 1374 | 0.532670388 | 0.213546566 | 0.547868099 | 0.632173095 | 0.6420508   |
| 1375 | 0.482003918 | 0.096364686 | 0.567343371 | 0.297749567 | 0.386035776 |
| 1377 | 0.707591293 | 0.497810219 | 0.611575823 | 0.727493917 | 0.709120198 |
| 1378 | 0.619251485 | 0.530598053 | 0.673871012 | 0.657510431 | 0.734700974 |
| 1383 | 0.569653646 | 0.372229141 | 0.653589765 | 0.506475716 | 0.574595268 |
| 1384 | 0.605268622 | 0.413215339 | 0.686997145 | 0.596224189 | 0.619115044 |
| 1389 | 0.567576345 | 0.580444402 | 0           | 0.975412223 | 0.935759102 |
| 1390 | 0.517997575 | 0.183186246 | 0.670992061 | 0.268265524 | 0.341491653 |
| 1437 | 0.638727372 | 0.612137203 | 0.641744377 | 0.942282322 | 0.884564644 |
| 1438 | 0.681968629 | 0.5301407   | 0.665592172 | 0.689557248 | 0.760810636 |
| 1440 | 0.537562356 | 0.446813848 | 0.690318418 | 0.596462619 | 0.550175615 |
| 1441 | 0.608422435 | 0.647263682 | 0.675733133 | 0.902155887 | 0.501658375 |
| 1455 | 0.571085367 | 0.373962559 | 0.553354786 | 0.586495156 | 0.623399352 |
| 1456 | 0.718315764 | 0.311642095 | 0.673993771 | 0.501270971 | 0.571428571 |
| 1461 | 0.641460198 | 0.545378292 | 0.621678498 | 0.637476933 | 0.748196611 |
| 1462 | 0.573813232 | 0.361742424 | 0.592401977 | 0.480955387 | 0.732954545 |
| 1464 | 0.582187392 | 0.576875769 | 0.488984179 | 0.534440344 | 0.709102091 |
| 1465 | 0.567526755 | 0.194618834 | 0.526557678 | 0.435874439 | 0.505829596 |
| 1488 | 0.571323025 | 0.30935186  | 0.551110877 | 0.74595484  | 0.833988482 |
| 1489 | 0.472977065 | 0.165705296 | 0.58542124  | 0.558468799 | 0.735186156 |
| 1491 | 0.540477038 | 0.538405928 | 0.663866145 | 0.826314838 | 0.699258992 |
| 1492 | 0.534401405 | 0.151186791 | 0.486338198 | 0.398864809 | 0.393188854 |
| 1494 | 0.572767066 | 0.217293021 | 0.555656043 | 0.550720543 | 0.688895168 |
| 1495 | 0.554472665 | 0.296244986 | 0.547282645 | 0.333311119 | 0.430154524 |

|       |             |             |             |             |             |
|-------|-------------|-------------|-------------|-------------|-------------|
| 1497  | 0.551444375 | 0.357359326 | 0.529918272 | 0.630335114 | 0.729465856 |
| 1498  | 0.561573374 | 0.317199654 | 0.528517398 | 0.686257563 | 0.719101124 |
| 1550  | 0.597720207 | 0           | 0.502279793 | 0.663755459 | 0.84279476  |
| 1551  | 0.535683311 | 0.684536996 | 0.481497543 | 0.38147984  | 0.567567568 |
| 1789  | 0.569084882 | 0.355345912 | 0.530650778 | 0.707861635 | 0.745597484 |
| 1790  | 0.561050264 | 0.420985285 | 0.634694103 | 0.556621881 | 0.522499467 |
| 1791  | 0.636351266 | 0.481632653 | 0.635353352 | 0.702332362 | 0.619241983 |
| 6984  | 0.666491443 | 0.442384291 | 0.642382733 | 0.583420737 | 0.686374788 |
| 6985  | 0.594825421 | 0.33034212  | 0.641195679 | 0.558048233 | 0.752103197 |
| 6986  | 0.613542759 | 0.290472646 | 0.620193907 | 0.596017864 | 0.694268701 |
| 6994  | 0.656700784 | 0.421961479 | 0.649368528 | 0.760681868 | 0.800531326 |
| 7000  | 0.620839994 | 0.374147217 | 0.599670591 | 0.457091562 | 0.522202274 |
| 7037  | 0.626780071 | 0.455448065 | 0.763255433 | 0.79302444  | 1.087746096 |
| 7051  | 0.632342738 | 0.577405858 | 0.586031452 | 0.845711297 | 0.771443515 |
| 7056  | 0.45297456  | 0.392421415 | 0.57201344  | 0.5511698   | 0.542988374 |
| 7346  | 0.560271968 | 0.281797361 | 0.600075927 | 0.579970078 | 0.719620591 |
| 7347  | 0.645637645 | 0.381255184 | 0.673997471 | 0.539120818 | 0.600774122 |
| 7357  | 0.63968016  | 0.453788179 | 0.619297494 | 0.661642205 | 0.684252281 |
| 11829 | 0.546594427 | 0.350634987 | 0.61873065  | 0.126903553 | 0.362098139 |
| 11830 | 0.672746485 | 0.262464986 | 0.658825691 | 0.510084034 | 0.540896359 |
| 11831 | 0.601785799 | 0.378895815 | 0.673690178 | 0.623775601 | 0.623775601 |
| 11832 | 0.634955151 | 0.371483376 | 0.640554499 | 0.717391304 | 0.704603581 |
| 11840 | 0.565137615 | 0           | 0.529408767 | 0.344827586 | 0.501668521 |
| 11881 | 0.514193835 | 0.288899901 | 0.52376728  | 0.49900892  | 0.573835481 |
| 11892 | 0.660479244 | 0.68149398  | 0.608119184 | 0.724058593 | 0.750287599 |
| 11893 | 0.661506056 | 0.362049336 | 0.565806565 | 0.681973435 | 0.55597723  |
| 11894 | 0.537701549 | 0.195370046 | 0.534460955 | 0.728165556 | 0.762188706 |
| 11918 | 0.554136373 | 0.288507109 | 0.637649833 | 0.317831754 | 0.561018957 |
| 11919 | 0.577806195 | 0.192099567 | 0.525234442 | 0.557088745 | 0.605519481 |
| 11920 | 0.929830069 | 0.52528312  | 0.878080163 | 0.832285653 | 0.72458209  |
| 11930 | 0.507307963 | 0.405761317 | 0.530213492 | 0.602057613 | 0.613580247 |
| 11931 | 0.603675059 | 0.496845006 | 0.558557694 | 0.709061901 | 0.851973726 |
| 11992 | 0.628815667 | 0.343364365 | 0.548119366 | 0.40073609  | 0.627192033 |
| 11993 | 0.679146526 | 0.470358367 | 0.620008372 | 0.885973462 | 0.75472659  |
| 11994 | 0.549640547 | 0.313043478 | 0.579037306 | 0.750197628 | 0.586824769 |
| 11995 | 0.867339379 | 0.443858011 | 0.971397037 | 0.588028056 | 0.723741199 |
| 12003 | 0.635004971 | 0.386728875 | 0.616331096 | 0.537325039 | 0.597459824 |
| 12004 | 0.555210072 | 0.422356717 | 0.555508587 | 0.614463671 | 0.672877049 |
| 12005 | 0.604923703 | 0.586459286 | 0.605534079 | 0.904849039 | 0.936413541 |
| 12006 | 0           | 0.583354009 | 0           | 0.7747786   | 0.79076217  |
| 12043 | 0.67252945  | 0.370634921 | 0.684827661 | 0.495238095 | 0.532936508 |
| 12044 | 0.639621881 | 0.427951389 | 0.678374625 | 0.596354167 | 0.542100694 |
| 12144 | 0.710369278 | 0.420572551 | 0.663963774 | 0.614931238 | 0.607914679 |

|       |             |             |             |             |             |
|-------|-------------|-------------|-------------|-------------|-------------|
| 12154 | 0.709329454 | 0.684980674 | 0.780281613 | 0.909718388 | 0.793944414 |
| 12155 | 0.591212158 | 0.551762606 | 0.562650168 | 0.904804403 | 0.75292042  |
| 12156 | 0.624846484 | 0.512613522 | 0.640581824 | 0.592330979 | 0.572149344 |
| 12234 | 0.675462573 | 0.223313565 | 0.607570384 | 0.686644308 | 0.725185382 |
| 12249 | 0.708207854 | 0.465527066 | 0.655181577 | 0.634567901 | 0.667426401 |
| 12272 | 0.657504733 | 0.414634146 | 0.653456943 | 0.379512195 | 0.461463415 |
| 12273 | 0.646994012 | 0.525686553 | 0.637700599 | 0.641690341 | 0.700284091 |
| 12275 | 0.629861147 | 0.196321321 | 0.569810934 | 0.521771772 | 0.68714858  |
| 12286 | 0.746491255 | 0.468853545 | 0.648428264 | 0.912193506 | 0.91119947  |
| 12287 | 0.884482247 | 0.503340132 | 0.921995264 | 0.769708968 | 0.76802309  |
| 12341 | 0.611313474 | 0.25876659  | 0.633818431 | 0.46443561  | 0.447253308 |
| 12347 | 0.578792596 | 0.380566802 | 0.481635242 | 0.791093117 | 0.732793522 |
| 12348 | 0.657034259 | 0.538327335 | 0.671316021 | 0.717233868 | 0.730300076 |
| 12399 | 0.638739188 | 0.094478528 | 0.596666818 | 0.612269939 | 0.628220859 |
| 12400 | 0.627137454 | 0.367873347 | 0.587344643 | 0.421333201 | 0.594716512 |
| 12413 | 0.679570387 | 0.60691584  | 0.706564815 | 0.649885584 | 0.695652174 |
| 12414 | 0.669346098 | 0.370293966 | 0.623825867 | 0.705002579 | 0.824651882 |
| 12489 | 0.694098872 | 0.384379001 | 0.64502557  | 0.46453265  | 0.386939821 |
| 12546 | 0.608991902 | 0.375585522 | 0.708209997 | 0.512562101 | 0.587508872 |
| 12717 | 0.59178903  | 0.4106814   | 0.590208731 | 0.030156538 | 0.313996317 |
| 12748 | 0.713186507 | 0.568732048 | 0.724003345 | 0.64792778  | 0.610997128 |
| 12749 | 0.68014495  | 0.609591393 | 0.780775849 | 0.891724848 | 0.838502919 |
| 12750 | 0.583410066 | 0.434876502 | 0.662650285 | 0.671885545 | 0.695370495 |
| 12751 | 0.615986779 | 0.273547094 | 0.563451335 | 0.438376754 | 0.491482966 |
| 12760 | 0.656699506 | 0.282506176 | 0.668408297 | 0.651021783 | 0.526835841 |
| 12761 | 0.608076542 | 0.512807109 | 0.63655563  | 0.589475518 | 0.712493466 |
| 12762 | 0.547903254 | 0.390769231 | 0.570871759 | 0.486769231 | 0.470769231 |
| 12763 | 0.658040949 | 0.325814219 | 0.767013537 | 0.480420732 | 0.495374477 |
| 12775 | 0.618139293 | 0.412260967 | 0.588773389 | 0.661417323 | 0.623734533 |
| 12776 | 0.615549666 | 0.177820268 | 0.586015398 | 0.407903123 | 0.407265774 |
| 12777 | 0.8795926   | 0.528389569 | 0.976537191 | 0.910814265 | 0.952278628 |
| 12778 | 0.651446759 | 0.184538767 | 0.595138889 | 0.385571344 | 0.390597158 |
| 12812 | 0.625719856 | 0.378310802 | 0.713464919 | 0.643611018 | 0.52093244  |
| 12813 | 0.496891853 | 0.333205521 | 0.639784282 | 0.432898773 | 0.358703988 |
| 12814 | 0.690278855 | 0.417380137 | 0.667047728 | 0.566780822 | 0.676369863 |
| 12815 | 0.641543376 | 0.317394317 | 0.614590118 | 0.58038808  | 0.428620929 |
| 12827 | 0.829679017 | 0.463932521 | 0.806342791 | 0.302761906 | 0.533198153 |
| 12828 | 0.586903545 | 0.308580858 | 0.55927207  | 0.484323432 | 0.577557756 |
| 12829 | 0.664558674 | 0.547669814 | 0.634528238 | 0.589399939 | 0.643009443 |
| 12830 | 0.423099881 | 0.383156114 | 0.473338639 | 0.460729821 | 0.758699855 |
| 12842 | 0.725527729 | 0.412332838 | 0.54543521  | 0.773402675 | 0.686478455 |
| 12843 | 0.606234517 | 0.332508834 | 0.5835673   | 0.444169611 | 0.502473498 |
| 12872 | 0.614287096 | 0.298835705 | 0.694331592 | 0.54894351  | 0.416990082 |

|       |             |             |             |             |             |
|-------|-------------|-------------|-------------|-------------|-------------|
| 12873 | 0.670705188 | 0.447382337 | 0.582133858 | 0.634902168 | 0.634584876 |
| 12874 | 0.595682419 | 0.361043983 | 0.54562723  | 0.579748671 | 0.355969067 |
| 12889 | 0.555815109 | 0.113366337 | 0.567445328 | 0.245049505 | 0.431683168 |
| 12890 | 0.655933973 | 0.300098912 | 0.6734847   | 0.361028684 | 0.52007913  |
| 12891 | 0.711717122 | 0.418122977 | 0.651806846 | 0.557065804 | 0.683063646 |
| 12892 | 0.683015403 | 0.476219699 | 0.634094419 | 0.54740718  | 0.677201596 |
| 18486 | 0.574617647 | 0.313164827 | 0.645343259 | 0.623888565 | 0.586843049 |
| 18487 | 0.492044064 | 0.123076923 | 0.530116601 | 0.40361991  | 0.502262443 |
| 18488 | 0.690170739 | 0.346759259 | 0.61338553  | 0.579166667 | 0.765277778 |
| 18489 | 0.539997597 | 0.336962514 | 0.602691337 | 0.457965821 | 0.499448732 |
| 18498 | 0.517188616 | 0.341902735 | 0.628413071 | 0.546913378 | 0.644178811 |
| 18499 | 0.632235669 | 0.58446029  | 0.568439816 | 0.731989181 | 0.658716499 |
| 18501 | 0.619054836 | 0.378108031 | 0.654719507 | 0.471420406 | 0.482280652 |
| 18502 | 0.674159579 | 0.534632854 | 0.698832186 | 0.641180924 | 0.746396937 |
| 18504 | 0.672495127 | 0.716698656 | 0.670461286 | 0.661228407 | 0.886628279 |
| 18505 | 0.677509377 | 0.38878327  | 0.639129782 | 0.496514575 | 0.741339248 |
| 18507 | 0.558427762 | 0.026348808 | 0.594458215 | 0.257214555 | 0.319113342 |
| 18508 | 0.528221027 | 0.20856202  | 0.539071761 | 0.486278814 | 0.566410538 |
| 18516 | 0.693026328 | 0.506053269 | 0.685068101 | 0.258419547 | 0.491965661 |
| 18517 | 0.563957337 | 0.334513274 | 0.627657227 | 0.500884956 | 0.497935103 |
| 18519 | 0.751943708 | 0.376837652 | 0.753138166 | 0.593442623 | 0.742464305 |
| 18520 | 0.473634698 | 0.506423259 | 0.528197257 | 0.574036511 | 0.620689655 |
| 18522 | 0.614868288 | 0.415       | 0.557814083 | 0.618       | 0.972       |
| 18523 | 0.648158671 | 0.430952036 | 0.660009532 | 0.754166063 | 0.841109984 |
| 18525 | 0.646637325 | 0.538781959 | 0.714105523 | 0.791151968 | 0.754811836 |
| 18526 | 0.674492124 | 0.446259673 | 0.71311543  | 0.916881628 | 0.928537308 |
| 18527 | 0.658194324 | 0.401249024 | 0.654715788 | 0.523289097 | 0.786104606 |
| 18528 | 0.577968944 | 0.289727127 | 0.639279726 | 0.49317817  | 0.585473515 |
| 18530 | 0.618198138 | 0.361022364 | 0.585212611 | 0.865814696 | 0.881789137 |
| 18531 | 0.646865443 | 0.026625502 | 0.610626911 | 0           | 0.473922902 |
| 18532 | 0.555700709 | 0.31672917  | 0.670727326 | 0.401108756 | 0.599461927 |
| 18533 | 0.689920935 | 0.464163823 | 0.589295488 | 0.755972696 | 0.756825939 |
| 18534 | 0.574255157 | 0.142857143 | 0.631168831 | 0.443064182 | 0.380952381 |
| 18535 | 0.617595692 | 0.202735318 | 0.608426721 | 0.279163315 | 0.390185036 |
| 18536 | 0.712912237 | 0.567263221 | 0.710735406 | 0.54936658  | 0.706414639 |
| 18537 | 0.646930065 | 0.335471456 | 0.56807486  | 0.66132136  | 0.584348942 |
| 18538 | 0.560062565 | 0.493513514 | 0.581717066 | 0.547387387 | 0.523963964 |
| 18539 | 0.548146733 | 0.387938794 | 0.615240097 | 0.588883888 | 0.661116112 |
| 18541 | 0.555988155 | 0.398470688 | 0.615557611 | 0.760407816 | 0.63126593  |
| 18542 | 0.635297144 | 0           | 0.628093645 | 0.110497238 | 0.406629834 |
| 18543 | 0.623756742 | 0.453104199 | 0.689024692 | 0.700714026 | 0.636330631 |
| 18544 | 0.550072104 | 0.169770774 | 0.62137478  | 0.767191977 | 0.648997135 |
| 18545 | 0.609470113 | 0.531831962 | 0.697136014 | 0.788220009 | 0.699870074 |

|       |             |             |             |             |             |
|-------|-------------|-------------|-------------|-------------|-------------|
| 18546 | 0.644687898 | 0.317073171 | 0.61110828  | 0.630589431 | 0.576727642 |
| 18547 | 1.008270589 | 0.329801807 | 0.949290661 | 0.699019818 | 0.701367786 |
| 18548 | 0.648526268 | 0.390289256 | 0.622792215 | 0.639256198 | 0.588429752 |
| 18549 | 0.539295531 | 0           | 0.588465845 | 0.531677019 | 0.501863354 |
| 18550 | 0.576946681 | 0.25        | 0.63773871  | 0.564710611 | 0.508440514 |
| 18552 | 0           | 0.486726457 | 0.539270881 | 0.652313526 | 0.727688908 |
| 18553 | 0.673428174 | 0.351378446 | 0.757438406 | 0.626566416 | 0.613784461 |
| 18555 | 0.560206268 | 0.200956938 | 0.589271364 | 0.299043062 | 0.41507177  |
| 18557 | 0.613038546 | 0.422071636 | 0.594438435 | 0.551306873 | 0.617618587 |
| 18558 | 0.656439705 | 0.291830494 | 0.586054143 | 0.54405126  | 0.647444299 |
| 18559 | 0.649734982 | 0.321782178 | 0.608215548 | 0.624752475 | 0.614851485 |
| 18560 | 0.71691096  | 0.457413249 | 0.638864581 | 0.758675079 | 0.784700315 |
| 18561 | 0.53826619  | 0.048021895 | 0.634883989 | 0.381628386 | 0.292343387 |
| 18562 | 0.60003775  | 0.23039923  | 0.574745187 | 0.60990861  | 0.667147667 |
| 18563 | 0.602966725 | 0.283231084 | 0.504699541 | 0.579243354 | 0.446148603 |
| 18564 | 0.630994627 | 0.333641405 | 0.633673949 | 0.384781269 | 0.471041282 |
| 18565 | 0.57205298  | 0.340815563 | 0.607593819 | 0.69509914  | 0.64983165  |
| 18566 | 0.74789328  | 0.600914962 | 0.742326062 | 0.773950484 | 0.79426803  |
| 18567 | 0.554544068 | 0.295217716 | 0.522249911 | 0.798226164 | 0.257206208 |
| 18570 | 0.609908313 | 0.320363165 | 0.590415286 | 0.660181582 | 0.715953307 |
| 18571 | 0.721371691 | 0.434935897 | 0.624747645 | 0.791025641 | 0.895726496 |
| 18572 | 0.638902526 | 0.475521499 | 0.623138603 | 0.5700298   | 0.62962963  |
| 18573 | 0.581063971 | 0.482401461 | 0.609168504 | 0.715262733 | 0.614220685 |
| 18574 | 0.693420188 | 0.296690307 | 0.624873005 | 0.552009456 | 0.655437352 |
| 18576 | 0.665038252 | 0.279818074 | 0.606415338 | 0.5017215   | 0.450714104 |
| 18577 | 0.641511387 | 0.583469722 | 0.641563147 | 0.51309329  | 0.495090016 |
| 18579 | 0.626181069 | 0.263417643 | 0.731527611 | 0.503392967 | 0.599629858 |
| 18582 | 0.51300212  | 0.257236246 | 0.643333506 | 0.209020902 | 0.349834983 |
| 18592 | 0.624462398 | 0           | 0.562201053 | 0.171253823 | 0.675992684 |
| 18593 | 0.697357324 | 0.367080745 | 0.696092213 | 0.38757764  | 0.571428571 |
| 18595 | 0.588458298 | 0.270880361 | 0.564207486 | 0.673814898 | 0.700902935 |
| 18596 | 0.628896106 | 0.210737179 | 0.599109813 | 0.666666667 | 0.955929487 |
| 18597 | 0.645822596 | 0           | 0.703086526 | 0.30698152  | 1.079055441 |
| 18599 | 0.520762215 | 0.187554019 | 0.551892801 | 0.61624892  | 0.643906655 |
| 18602 | 0.590744899 | 0.344917463 | 0.63863126  | 0.598609904 | 0.692730959 |
| 18603 | 0.652360515 | 0.427268363 | 0.656843109 | 0.664426308 | 0.62506001  |
| 18605 | 0.588409198 | 0.275390625 | 0.532144533 | 0.493164063 | 0.63671875  |
| 18606 | 0.580618062 | 0.1842871   | 0.623074483 | 0.55771096  | 0.646944714 |
| 18608 | 0.565194482 | 0.342533937 | 0.664303506 | 0.509049774 | 0.573755656 |
| 18609 | 0.690744391 | 0.268450933 | 0.640664602 | 0.53163017  | 0.508515815 |
| 18610 | 0.572792223 | 0.24512567  | 0.563422347 | 0.491056771 | 0.462522832 |
| 18611 | 0.672262933 | 0.344282238 | 0.683254949 | 0.561638281 | 0.484184915 |
| 18612 | 0.647403378 | 0.099665552 | 0.590868678 | 0.309698997 | 0.438795987 |

|       |             |             |             |             |             |
|-------|-------------|-------------|-------------|-------------|-------------|
| 18613 | 0.684375178 | 0.08520764  | 0.642739321 | 0.421349661 | 0.64549034  |
| 18614 | 0.531127146 | 0.249763404 | 0.578800697 | 0.629394813 | 0.399423631 |
| 18615 | 0.635674583 | 0           | 0.552371328 | 0.227817746 | 0.278177458 |
| 18616 | 0.597322809 | 0.175984122 | 0.598665473 | 0.539530268 | 0.517697651 |
| 18617 | 0.598225444 | 0.035266458 | 0.56464009  | 0.684952978 | 0.956896552 |
| 18618 | 0.570965251 | 0           | 0.543706564 | 0.42172524  | 0.576996805 |
| 18619 | 0.673765494 | 0.006769826 | 0.744041658 | 0.234042553 | 0.473887814 |
| 18620 | 0.64418409  | 0.557632399 | 0.609618746 | 0.59709242  | 0.332294912 |
| 18621 | 0.590515708 | 0.088285229 | 0.558743331 | 0.482173175 | 0.148556876 |
| 18622 | 0.68735553  | 0.350508838 | 0.601448384 | 0.533690412 | 0.664167113 |
| 18623 | 0.708614122 | 0.214023943 | 0.660445356 | 0.429025165 | 0.52821891  |
| 18624 | 0.631701991 | 0.157078987 | 0.706769428 | 0.729061103 | 0.64023845  |
| 18625 | 0.601731738 | 0.278707572 | 0.623014507 | 0.459194497 | 0.592647707 |
| 18626 | 0.683857486 | 0.457091925 | 0.69466803  | 0.774934043 | 0.927442802 |
| 18627 | 0.588211195 | 0           | 0.560454755 | 0.201492537 | 0.468113976 |
| 18628 | 0.604721129 | 0.170661157 | 0.628280491 | 0.688842975 | 0.716528926 |
| 18630 | 0.709120381 | 0.333241531 | 0.690628205 | 0.561369687 | 0.610208391 |
| 18631 | 0.611730428 | 0.217464316 | 0.671712693 | 0.451721243 | 0.661628883 |
| 18632 | 0.611824459 | 0.260670295 | 0.628887748 | 0.66571183  | 0.794614724 |
| 18633 | 0.597802198 | 0.113967438 | 0.555156382 | 0.405312768 | 0.680377035 |
| 18634 | 0.577870216 | 0           | 0.596838602 | 0.430978613 | 0.772521063 |
| 18635 | 0.550457347 | 0.205761317 | 0.552893219 | 0.59304984  | 0.595793324 |
| 18636 | 0.595099236 | 0.259932585 | 0.561232335 | 0.619380152 | 0.721873234 |
| 18637 | 0.619495192 | 0.412022139 | 0.833058417 | 0.665722744 | 0.73677436  |
| 18638 | 0.744910563 | 0.448985407 | 0.652424075 | 0.997577958 | 0.932182819 |
| 18639 | 0.691111911 | 0.318066158 | 0.581935948 | 0.704834606 | 0.347328244 |
| 18640 | 0.622446889 | 0.061283492 | 0.659617906 | 0           | 0.208804945 |
| 18641 | 0.593318848 | 0.08749581  | 0.541390549 | 0.586322494 | 0.75527992  |
| 18642 | 0.618254555 | 0           | 0.649780406 | 0.310030395 | 0.594224924 |
| 18643 | 0.538200414 | 0           | 0.543049861 | 0.741452991 | 0.492521368 |
| 18645 | 0.570690149 | 0.079967414 | 0.534009666 | 0.553487121 | 0.562489396 |
| 18647 | 0.598128961 | 0.178793419 | 0.665996043 | 0.469835466 | 0.586471664 |
| 18740 | 0.614605279 | 0.212555442 | 0.642582724 | 0.578300921 | 0.681337427 |
| 18745 | 0.675480693 | 0.314143921 | 0.684391394 | 0.693796526 | 0.65707196  |
| 18747 | 0.609447109 | 0.012839879 | 0.593566193 | 0.498334372 | 0.120090634 |
| 18748 | 0.684061753 | 0.132701422 | 0.585282515 | 0.705730289 | 0.737613098 |
| 18749 | 0.602913418 | 0.088951311 | 0.619696348 | 0.502808989 | 0.378277154 |
| 18853 | 0.586898085 | 0.077257364 | 0.556798195 | 0.563495896 | 0.450024143 |
| 18856 | 0.534293692 | 0           | 0.593169587 | 0.173441734 | 0.353206865 |
| 18858 | 0.545876335 | 0           | 0.601879666 | 0.037721893 | 0.586538462 |
| 18861 | 0.816549534 | 0.387343778 | 0.829103074 | 0.739063898 | 0.744681273 |
| 18867 | 0.506348342 | 0.295854376 | 0.571637388 | 0.427377911 | 0.534818882 |
| 18868 | 0.673888012 | 0.34272441  | 0.676274144 | 0.299413607 | 0.425607363 |

|       |             |             |             |             |             |
|-------|-------------|-------------|-------------|-------------|-------------|
| 18870 | 0.742554281 | 0.438593987 | 0.733876847 | 0.748126092 | 0.686531681 |
| 18873 | 0.642323705 | 0.319562791 | 0.709159752 | 0.560050352 | 0.674582102 |
| 18910 | 0.616086032 | 0.328518468 | 0.679786822 | 0.507483374 | 0.635503819 |
| 18912 | 0.617489492 | 0.109476388 | 0.647770147 | 0.197640663 | 0.445179928 |
| 18916 | 0.611297345 | 0.19666065  | 0.551928968 | 0.42045732  | 0.492187146 |
| 18917 | 0.681798172 | 0.372274283 | 0.654724667 | 0.724838102 | 0.782045475 |
| 18923 | 0.570682997 | 0.053047699 | 0.653465834 | 0.507681741 | 0.68057315  |
| 18924 | 0.627969332 | 0.252197481 | 0.687646763 | 0.578855283 | 0.63364842  |
| 18933 | 0           | 0.335644421 | 0           | 0.428923986 | 0.533717144 |
| 18934 | 0.653088414 | 0           | 0.55674448  | 0.389956492 | 0.121202568 |
| 18939 | 0.668164864 | 0.266473982 | 0.640066437 | 0.294386965 | 0.845598681 |
| 18940 | 0.702129453 | 0.411235307 | 0.739717312 | 0.794093882 | 0.632259793 |
| 18941 | 0.667537665 | 0.537512015 | 0.722818433 | 0.653811061 | 0.80193194  |
| 18942 | 0.648218795 | 0.309184512 | 0.653732161 | 0.897811382 | 0.959874778 |
| 18943 | 0.563285988 | 0.224678203 | 0.594000209 | 0.628071293 | 0.836041013 |
| 18944 | 0.674824116 | 0.287806449 | 0.681137684 | 0.450228542 | 0.421624118 |
| 18945 | 0.588678092 | 0.06340786  | 0.564427111 | 0.427017866 | 0.459301946 |
| 18946 | 0.630231561 | 0.255674147 | 0.675930624 | 0.386123139 | 0.644537516 |
| 18947 | 0.536023796 | 0.270618557 | 0.675896005 | 0.67583047  | 0.838487973 |
| 18948 | 0.797834844 | 0.600174978 | 0.790465074 | 1.020086031 | 0.869313211 |
| 18949 | 0.590124005 | 0.25344332  | 0.709709883 | 0.551748649 | 0.617950237 |
| 18950 | 0.841103274 | 0.524218034 | 0.856786293 | 0.817108882 | 0.789088297 |
| 18951 | 0.683915879 | 0.226306038 | 0.636161337 | 0.618933963 | 0.588750443 |
| 18952 | 0.576027203 | 0.167771883 | 0.677415698 | 0.472811671 | 0.702917772 |
| 18953 | 0.72257129  | 0.381167837 | 0.836376795 | 0.651690804 | 0.67745885  |
| 18954 | 0.562931918 | 0           | 0.593991539 | 0.263925475 | 0.491364233 |
| 18955 | 0.585974629 | 0.257074819 | 0.645108015 | 0.545343862 | 0.667244471 |
| 18956 | 0.675880901 | 0.23414785  | 0.730305977 | 0.436127436 | 0.447571915 |
| 18957 | 0.550899782 | 0           | 0.532573267 | 0.367857935 | 0.547293911 |
| 18959 | 0.606742265 | 0.23083779  | 0.617650684 | 0.443850267 | 0.598930481 |
| 18960 | 0.720951852 | 0.418904591 | 0.652353032 | 0.611844593 | 0.598661362 |
| 18961 | 0.674521062 | 0.37685503  | 0.685839467 | 0.748049047 | 0.725338587 |
| 18962 | 0.495063134 | 0.176974162 | 0.603514999 | 0.752340749 | 0.744710807 |
| 18963 | 0.636602734 | 0.105363417 | 0.625078913 | 0.382765333 | 0.500751365 |
| 18964 | 0.578010582 | 0.110448103 | 0.538274466 | 0.45031576  | 0.580212476 |
| 18965 | 0.508664245 | 0           | 0.507495094 | 0.458225221 | 0.738453555 |
| 18966 | 0.676275871 | 0.348002229 | 0.724654109 | 0.517430789 | 0.550400153 |
| 18967 | 0.595462019 | 0.487708168 | 0.618612299 | 0.6740682   | 0.901665345 |
| 18968 | 0.607547969 | 0.07321536  | 0.661105978 | 0.374869283 | 0.586441293 |
| 18969 | 0.639398906 | 0.487726186 | 0.665782199 | 0.691844946 | 0.776271979 |
| 18970 | 0.716923357 | 0.484175605 | 0.726205058 | 0.846446567 | 0.753169928 |
| 18971 | 0.893751992 | 0.592855623 | 0.901672427 | 0.714500392 | 0.722144735 |
| 18972 | 0.619205683 | 0.276939665 | 0.707906908 | 0.480963177 | 0.614789074 |



|       |             |             |             |             |             |
|-------|-------------|-------------|-------------|-------------|-------------|
| 18973 | 0.5580651   | 0.060267299 | 0.596974141 | 0.430899722 | 0.548275929 |
| 18974 | 0.628596944 | 0.194344525 | 0.629327243 | 0.393616861 | 0.710911163 |
| 18975 | 0.698024509 | 0.016624685 | 0.690312698 | 0.465491184 | 0.436775819 |
| 18976 | 0.634646958 | 0.313361297 | 0.681110692 | 0.632009279 | 0.651638007 |
| 18977 | 0.606751112 | 0.374797041 | 0.596809242 | 0.625535159 | 0.636610489 |
| 18978 | 0.676474119 | 0.396829041 | 0.747748701 | 0.601234238 | 0.69516903  |
| 18979 | 0.692699888 | 0.352551599 | 0.64766816  | 0.601317748 | 0.880648703 |
| 18980 | 0.582109072 | 0.174461972 | 0.655665584 | 0.226681842 | 0.428717028 |
| 18981 | 0.641524812 | 0.420713914 | 0.688258423 | 0.563435878 | 0.730265913 |
| 18982 | 0.678758957 | 0.230460053 | 0.660016718 | 0.628387293 | 0.620599059 |
| 18983 | 0.588676871 | 0.198825292 | 0.603396058 | 0.486485467 | 0.575787717 |
| 18984 | 0.598783362 | 0.359506901 | 0.632721951 | 0.725920747 | 0.744813105 |
| 18985 | 0.546679645 | 0.320984466 | 0.620775154 | 0.720221465 | 0.560528666 |
| 18986 | 0.631462455 | 0.447050605 | 0.707190323 | 0.542642016 | 0.600159882 |
| 18988 | 0.671865042 | 0.191577494 | 0.676163699 | 0.653089403 | 0.636865723 |
| 18989 | 0.697967022 | 0.268225479 | 0.66867304  | 0.423932629 | 0.506465313 |
| 18990 | 0.67203607  | 0.353803295 | 0.635434068 | 0.704102456 | 0.764262357 |
| 18991 | 0.656553668 | 0.374566018 | 0.634602422 | 0.635639334 | 0.727455638 |
| 18993 | 0.625449843 | 0.101068999 | 0.621907332 | 0.445092323 | 0.449951409 |
| 18994 | 0.659826809 | 0.626680551 | 0.634762057 | 0.713323181 | 0.753207683 |
| 18995 | 0.747175773 | 0.53066386  | 0.704792711 | 0.766298858 | 0.841867283 |
| 18997 | 0.548803454 | 0.227319062 | 0.600431767 | 0.682976555 | 0.822629969 |
| 18998 | 0.62369168  | 0.554162936 | 0.584663828 | 0.730975828 | 0.615487914 |
| 18999 | 0.654217259 | 0.466666667 | 0.661643539 | 0.607843137 | 0.567755991 |
| 19000 | 0.565163576 | 0.30835041  | 0.632324371 | 0.354711346 | 0.444335059 |
| 19001 | 0.599113806 | 0.166051661 | 0.565598348 | 0.733790195 | 0.762256194 |
| 19002 | 0.678531844 | 0.563369886 | 0.706581976 | 0.832560101 | 0.700021088 |
| 19003 | 0.656964147 | 0.447318268 | 0.711050243 | 0.657228424 | 0.728832017 |
| 19004 | 0.677976146 | 0.178133836 | 0.580094229 | 0.512723845 | 0.75871819  |
| 19005 | 0.642239977 | 0.290780142 | 0.626152344 | 0.602836879 | 0.693169093 |
| 19007 | 0.687080943 | 0.479077711 | 0.647404438 | 0.70509536  | 0.72018218  |
| 19009 | 0.611186275 | 0.354403409 | 0.627460784 | 0.684422348 | 0.608664773 |
| 19010 | 0.668114819 | 0.472071289 | 0.629660975 | 0.774614214 | 0.885459683 |
| 19012 | 0.67141326  | 0.271707029 | 0.620349104 | 0.527466037 | 0.654459539 |
| 19027 | 0.608558292 | 0.381997313 | 0.663761248 | 0.676892073 | 0.714957456 |
| 19028 | 0.982886293 | 0.538085457 | 0.993199113 | 0.791103505 | 0.853745218 |
| 19031 | 0.508963021 | 0.270123861 | 0.57157341  | 0.578293786 | 0.604078584 |
| 19035 | 0.602542656 | 0.109361545 | 0.607895617 | 0.06684492  | 0.411764706 |
| 19036 | 0.601281483 | 0.05351932  | 0.605645375 | 0.201296973 | 0.806481645 |
| 19038 | 0.605282831 | 0.469667319 | 0.644717169 | 0.432485323 | 0.692759295 |
| 19041 | 0.675475874 | 0.146010187 | 0.61218763  | 0.585314092 | 0.412988115 |
| 19044 | 0.758688559 | 0.535860368 | 0.700965003 | 0.754014728 | 0.759984829 |
| 19046 | 0.503039514 | 0.40606339  | 0.531525212 | 0.49701424  | 0.602204869 |

|       |             |             |             |             |             |
|-------|-------------|-------------|-------------|-------------|-------------|
| 19054 | 0.739855426 | 0.620473096 | 0.662920913 | 0.882231291 | 0.876677136 |
| 19055 | 0.684323843 | 0.334553776 | 0.71511565  | 0.572997712 | 0.632951945 |
| 19056 | 0.636629842 | 0.112033195 | 0.629841608 | 0.283817427 | 0.310373444 |
| 19057 | 0.647564578 | 0.350495985 | 0.650746156 | 0.598488427 | 0.546055739 |
| 19058 | 0.589965195 | 0.349889625 | 0.613390169 | 0.718175129 | 0.653789551 |
| 19059 | 0.725467864 | 0.520423601 | 0.656252427 | 0.835098336 | 0.775424441 |
| 19060 | 0.916360926 | 0.384639112 | 0.997735611 | 0.700801974 | 0.694941394 |
| 19062 | 0.600853595 | 0.445777573 | 0.699612002 | 0.69589294  | 0.712505768 |
| 19063 | 0.625380093 | 0.291452991 | 0.615987567 | 0.466666667 | 0.62991453  |
| 19064 | 0.627404415 | 0.351864884 | 0.606162558 | 0.804363125 | 0.825123153 |
| 19065 | 0.458467618 | 0           | 0.540122685 | 0.544011544 | 0.576479076 |
| 19066 | 0.631232782 | 0.27990092  | 0.592045455 | 0.640481246 | 0.689667374 |
| 19067 | 0.555756091 | 0.323357413 | 0.620256972 | 0.629858961 | 0.7000344   |
| 19068 | 0.649804661 | 0.461305925 | 0.658258117 | 0.708383716 | 0.981794975 |
| 19070 | 0.6829806   | 0.535578947 | 0.667989418 | 0.941894737 | 0.749473684 |
| 19072 | 0.713671704 | 0.461928105 | 0.708032194 | 0.827941176 | 0.709150327 |
| 19074 | 0.624003432 | 0.248898991 | 0.623967681 | 0.568688734 | 0.445091632 |
| 19075 | 0.686133287 | 0.450634205 | 0.660436483 | 0.696485605 | 0.494113294 |
| 19076 | 0.605251811 | 0.24        | 0.567911349 | 0.446984127 | 0.86984127  |
| 19077 | 0.543465257 | 0           | 0.558166042 | 0.149343131 | 0.36533788  |
| 19078 | 0.622597734 | 0.152955767 | 0.580720003 | 0.470442332 | 0.479950393 |
| 19079 | 0.734991981 | 0.593592301 | 0.755407221 | 0.717873489 | 0.779838047 |
| 19080 | 0.667058983 | 0.474872346 | 0.669186547 | 0.790110185 | 0.96371943  |
| 19081 | 0.711367108 | 0.384180791 | 0.692718941 | 0.588512241 | 0.746704331 |
| 19082 | 0.791457587 | 0.610324791 | 0.765591398 | 0.881182956 | 0.771901073 |
| 19083 | 0.716344861 | 0.438123167 | 0.748776421 | 0.648680352 | 0.835777126 |
| 19084 | 0.661145336 | 0.334277264 | 0.607114606 | 0.785350198 | 0.623749292 |
| 19085 | 0.710009481 | 0.393172318 | 0.60263443  | 0.732234092 | 0.573385973 |
| 19086 | 0.63113791  | 0.538178672 | 0.674551639 | 0.692623837 | 0.661258923 |
| 19087 | 0.539719148 | 0.263067695 | 0.52699248  | 0.605826907 | 0.718937446 |
| 19088 | 0.573797621 | 0.181571816 | 0.682847785 | 0.427168022 | 0.513550136 |
| 19092 | 0.715395823 | 0.552040348 | 0.702646916 | 0.640531866 | 0.770747364 |
| 19093 | 0.622433634 | 0.321726336 | 0.582679482 | 0.718979892 | 0.584600294 |
| 19095 | 0.538037798 | 0.23908005  | 0.585414438 | 0.5749688   | 0.601711535 |
| 19096 | 0.587169111 | 0.36324544  | 0.65986624  | 0.709904546 | 0.512191664 |
| 19098 | 0.66758175  | 0.476339654 | 0.635974928 | 0.671723001 | 0.711788953 |
| 19099 | 0.71387511  | 0.519026344 | 0.742362431 | 1.003235249 | 0.786781698 |
| 19107 | 0.661716172 | 0.61056437  | 0.660571159 | 0.838923479 | 0.510343442 |
| 19108 | 0.623250453 | 0           | 0.498348713 | 0.269396254 | 0.301537874 |
| 19113 | 0.673989321 | 0.370827286 | 0.649478769 | 0.332365747 | 0.480406386 |
| 19114 | 0.958584471 | 0.603014191 | 0.900952935 | 0.942133532 | 0.963314843 |
| 19116 | 0.542366572 | 0.233707865 | 0.58940952  | 0.514606742 | 0.573033708 |
| 19117 | 0.660313009 | 0.172698244 | 0.577930198 | 0.445449707 | 0.638903672 |

|       |             |             |             |             |             |
|-------|-------------|-------------|-------------|-------------|-------------|
| 19118 | 0.690497305 | 0.483148295 | 0.749641858 | 0.677835052 | 0.73037272  |
| 19119 | 0.709954594 | 0.510661921 | 0.669586774 | 0.63166768  | 0.794662261 |
| 19121 | 0.67481203  | 0.194394674 | 0.563771167 | 0.396475786 | 0.568061476 |
| 19130 | 0.712264421 | 0.519974716 | 0.785673369 | 0.794184576 | 0.608217446 |
| 19131 | 0.661288218 | 0.28526971  | 0.639368503 | 0.438278008 | 0.519190871 |
| 19137 | 0.675550232 | 0.393530997 | 0.659704547 | 0.753680282 | 0.685050798 |
| 19138 | 0.6593997   | 0.559030348 | 0.704293021 | 0.828830496 | 0.840118431 |
| 19141 | 0.600911298 | 0.330845434 | 0.720662465 | 0.531686796 | 0.596824535 |
| 19143 | 0.633593553 | 0.338189845 | 0.573491144 | 0.66799117  | 0.694922737 |
| 19144 | 0.652285438 | 0.459989675 | 0.659602203 | 0.556014455 | 0.745482705 |
| 19146 | 0.522902664 | 0.341063433 | 0.620702819 | 0.597315456 | 0.575424507 |
| 19147 | 0.596859239 | 0.361531612 | 0.615657955 | 0.546156129 | 0.757494806 |
| 19149 | 0.633615478 | 0.48544314  | 0.623941959 | 0.814701625 | 0.746501528 |
| 19150 | 0.606883597 | 0.318165532 | 0.641906521 | 0.566463633 | 0.677893228 |
| 19152 | 0.553398589 | 0.49089864  | 0.566141701 | 0.785016287 | 0.854378233 |
| 19153 | 0.746163046 | 0.253636364 | 0.59253538  | 0.459090909 | 0.570454545 |
| 19159 | 0.83453591  | 0.751234389 | 0.74649838  | 0.728289283 | 0.807435376 |
| 19160 | 0.553110344 | 0.508416352 | 0.683347936 | 0.616283064 | 0.643421505 |
| 19171 | 0.605286912 | 0.350599315 | 0.69245648  | 0.425941781 | 0.480736301 |
| 19172 | 0.525396447 | 0.134927066 | 0.554608322 | 0.315640194 | 0.482576985 |
| 19184 | 0.583567779 | 0.462022661 | 0.611816042 | 0.328787243 | 0.583088544 |
| 19185 | 0.617374172 | 0.440695836 | 0.736987283 | 0.537427517 | 0.581444386 |
| 19189 | 0.528569806 | 0.074688797 | 0.555927903 | 0.344628861 | 0.383817427 |
| 19190 | 0.540724591 | 0.486054972 | 0.619401378 | 0.856911884 | 0.692805174 |
| 19197 | 0.6189795   | 0.57198083  | 0.696822927 | 0.773497668 | 0.78326519  |
| 19198 | 0.614270767 | 0.184266103 | 0.589394809 | 0.587117212 | 0.683210137 |
| 19200 | 0.696136985 | 0.323749416 | 0.711494895 | 0.332398317 | 0.501402525 |
| 19201 | 0.50623104  | 0.195562436 | 0.515618595 | 0.237358101 | 0.565531476 |
| 19204 | 0.593899646 | 0.34797136  | 0.5292005   | 0.489260143 | 0.802863962 |
| 19206 | 0.6073903   | 0.442405708 | 0.624977794 | 0.569826707 | 0.515800204 |
| 19207 | 0.604585352 | 0.227670753 | 0.549282939 | 0.347343841 | 0.609457093 |
| 19209 | 0.570668949 | 0.294824258 | 0.618117472 | 0.5678856   | 0.571670691 |
| 19210 | 0.540374633 | 0.398589065 | 0.608395396 | 0.610582011 | 0.840917108 |
| 19213 | 0.59644922  | 0.384814495 | 0.680663435 | 0.339085418 | 0.355478861 |
| 19214 | 0.618710958 | 0           | 0.609558859 | 0.32576229  | 0.698195395 |
| 19222 | 0.682945355 | 0.312317572 | 0.748894151 | 0.429071804 | 0.539988325 |
| 19223 | 0.579559023 | 0.160371877 | 0.534147895 | 0.377396862 | 0.563916328 |
| 19225 | 0.623801007 | 0.122806823 | 0.559614436 | 0.783957146 | 0.753178438 |
| 19235 | 0.661190465 | 0.205719163 | 0.596451031 | 0.416559966 | 0.714041827 |
| 19236 | 0.63247084  | 0.277484398 | 0.547685562 | 0.445991359 | 0.620739318 |
| 19247 | 0.637174601 | 0           | 0.68072338  | 0.047957371 | 0.204262877 |
| 19248 | 0.569089444 | 0.227544215 | 0.547835986 | 0.459387791 | 0.559283525 |
| 19256 | 0.611444805 | 0.28319209  | 0.607021104 | 0.60240113  | 0.738700565 |

|       |             |             |             |             |             |
|-------|-------------|-------------|-------------|-------------|-------------|
| 19257 | 0.597796474 | 0.268163804 | 0.614756944 | 0.752972259 | 0.739321885 |
| 19307 | 0.76696924  | 0.179916318 | 0.623865349 | 0.521751933 | 0.531903766 |
| 19308 | 0.538228411 | 0.358346928 | 0.627881996 | 0.504078303 | 0.723219141 |
| 19309 | 0.720556488 | 0.532830739 | 0.606044615 | 0.677285992 | 0.624270428 |
| 19310 | 0.671330787 | 0.297800338 | 0.671633325 | 0.728003384 | 0.735194585 |
| 19311 | 0.603479702 | 0.321875    | 0.641259321 | 0.644034091 | 0.595170455 |
| 19312 | 0.617341641 | 0.321348315 | 0.634735202 | 0.675955056 | 0.534831461 |
| 19313 | 0.506403235 | 0.559346909 | 0.659617491 | 0.411117226 | 0.571271326 |
| 19314 | 0.661087455 | 0.154826066 | 0.667736652 | 0.687898089 | 0.6722195   |
| 19315 | 0.622160956 | 0.347211419 | 0.584167529 | 0.567031987 | 0.576060332 |
| 19316 | 0.618980593 | 0.223540146 | 0.636169759 | 0.318430657 | 0.665145985 |
| 19317 | 0.462668131 | 0.220111732 | 0.582349712 | 0.198882682 | 0.238175047 |
| 19318 | 0.601480174 | 0.207698816 | 0.636622065 | 0.182318105 | 0.475888325 |
| 19319 | 0.579955433 | 0           | 0.556876061 | 0.079088472 | 0.507372654 |
| 19321 | 0.671545148 | 0.35209826  | 0.645999645 | 0.473387922 | 0.502047083 |
| 19324 | 0.556730515 | 0.081300813 | 0.683084916 | 0.048780488 | 0.432520325 |
| 19327 | 0.498527312 | 0.344858689 | 0.586977865 | 0.124774504 | 0.397775105 |
| 19328 | 0.591544848 | 0.435440303 | 0.723154665 | 0.686115613 | 0.80713128  |
| 19334 | 0.707016057 | 0           | 0.603089759 | 0           | 0.10554951  |
| 19338 | 0.580233126 | 0.539060912 | 0.642911984 | 0.751880209 | 0.673622874 |
| 19350 | 0.684746834 | 0.623006283 | 0.697859343 | 0.807636539 | 0.865635573 |
| 19351 | 0.552245011 | 0.322531258 | 0.563913525 | 0.511610105 | 0.648890023 |
| 19352 | 0.829053907 | 0.453301447 | 0.85731135  | 0.615718814 | 0.750598965 |
| 19355 | 0.669220999 | 0.278       | 0.749322608 | 0.5676      | 0.6812      |
| 19359 | 0.605194317 | 0.450685139 | 0.606676215 | 0.641093426 | 0.663763231 |
| 19360 | 0.703034525 | 0.307534334 | 0.652488136 | 0.688486715 | 0.722757027 |
| 19371 | 0.678589336 | 0.307732772 | 0.612067525 | 0.634928985 | 0.731720147 |
| 19372 | 0.688321512 | 0.525512518 | 0.673073332 | 0.701742536 | 0.818143024 |
| 19374 | 0.503417246 | 0.238615665 | 0.605649846 | 0.310564663 | 0.345173042 |
| 19375 | 0.511740464 | 0.036180905 | 0.48902626  | 0.057286432 | 0.583919598 |
| 19376 | 0.593720038 | 0.298099762 | 0.63590604  | 0.45783848  | 0.484263658 |
| 19377 | 0.563672679 | 0.07591623  | 0.594298511 | 0.310209424 | 0.755235602 |
| 19379 | 0.670017263 | 0.470708574 | 0.689953778 | 0.81532453  | 0.94123117  |
| 19380 | 0.585515702 | 0.139772046 | 0.684609593 | 0.26034793  | 0.438512298 |
| 19381 | 0.657382713 | 0.408464567 | 0.625257607 | 0.641732283 | 0.863681102 |
| 19383 | 0.56069638  | 0.3952      | 0.59369942  | 0.3424      | 0.4248      |
| 19384 | 0.625721396 | 0.354934982 | 0.617938264 | 1.000213174 | 0.578767853 |
| 19385 | 0.602317246 | 0.219529579 | 0.60898558  | 0           | 0.516393443 |
| 19390 | 0.616125448 | 0.428838077 | 0.709593777 | 0.625291647 | 0.760615959 |
| 19391 | 0.604251223 | 0.405919894 | 0.743573733 | 0.474985329 | 0.536421655 |
| 19393 | 0.65363472  | 0.485652088 | 0.635515371 | 0.507817138 | 0.472788443 |
| 19394 | 0.554446991 | 0.417064629 | 0.638173565 | 0.475644699 | 0.444762814 |
| 19395 | 0.97430161  | 0.743586607 | 0.813141409 | 0.790614391 | 0.829580269 |

|       |             |             |             |             |             |
|-------|-------------|-------------|-------------|-------------|-------------|
| 19396 | 0.528158153 | 0.366774542 | 0.607094452 | 0.819848975 | 0.627831715 |
| 19398 | 0.608798632 | 0.311993406 | 0.625948507 | 0.465311169 | 0.532902871 |
| 19399 | 0.521641021 | 0.327571305 | 0.55075475  | 0.314174589 | 0.503025065 |
| 19401 | 0.681625105 | 0.685542971 | 0.591412142 | 0.569842327 | 1.123251166 |
| 19403 | 0.760954556 | 0.546896102 | 0.700748873 | 0.805953144 | 0.78848036  |
| 19404 | 0.571843073 | 0.148088531 | 0.608500204 | 0.451055701 | 0.635814889 |
| 19428 | 0.645540797 | 0.29009434  | 0.698244782 | 0.416105121 | 0.631738544 |
| 19429 | 0.702825782 | 0.464426877 | 0.745066558 | 0.721495895 | 0.664335664 |
| 19430 | 0.433414044 | 0.168359942 | 0.600960584 | 0.484179971 | 0.597387518 |
| 19431 | 0.610309705 | 0.367809132 | 0.617586448 | 0.43066489  | 0.622865447 |
| 19435 | 0.494736231 | 0           | 0.567954531 | 0.216767205 | 0.407909723 |
| 19436 | 0.520605847 | 0           | 0.502289539 | 0.297802198 | 0.356043956 |
| 19438 | 0.598411024 | 0.508833922 | 0.750015517 | 0.706713781 | 0.760306243 |
| 19439 | 0.677275832 | 0.5350759   | 0.815441136 | 0.646366658 | 0.690020659 |
| 19440 | 0.436911849 | 0.072909547 | 0.540189112 | 0.414900889 | 0.601048075 |
| 19443 | 0.731997588 | 0.666850771 | 0.76967274  | 0.923070854 | 0.867050655 |
| 19446 | 0.507081207 | 0.027848101 | 0.604692194 | 0.589873418 | 0.786708861 |
| 19449 | 0.606279207 | 0.463629097 | 0.663309287 | 0.671995737 | 0.772448708 |
| 19451 | 0.378508493 | 0           | 0.531872912 | 0.197558281 | 0.802478408 |
| 19452 | 0.540133856 | 0.185346707 | 0.614493423 | 0.585259485 | 0.633667684 |
| 19453 | 0.753055641 | 0.560163481 | 0.750959714 | 0.725387667 | 0.688183676 |
| 19455 | 0.539437215 | 0.269650029 | 0.676375253 | 0.849684452 | 0.662650602 |
| 19457 | 0.548628116 | 0           | 0.641866014 | 0.225910064 | 0.281584582 |
| 19461 | 0           | 0.453542568 | 0.582298815 | 0.602903238 | 0.603707811 |
| 19462 | 0.548369341 | 0           | 0.541832943 | 0.202780554 | 0.401397256 |
| 19463 | 0.868855719 | 0.368537787 | 0.739317832 | 0.611967326 | 0.602555288 |
| 19466 | 0.73397082  | 0.474067454 | 0.731621361 | 0.748386456 | 0.809684573 |
| 19467 | 0.644100119 | 0.490998363 | 0.664719905 | 0.771119224 | 0.809895505 |
| 19468 | 0.625260274 | 0.026927672 | 0.606356164 | 0.290138774 | 0.244554728 |
| 19469 | 0.527952167 | 0.358980957 | 0.64044416  | 0.369531652 | 0.569994853 |
| 19471 | 0.59022183  | 0           | 0.611190818 | 0.16558993  | 0.379722878 |
| 19472 | 0.537404199 | 0.304520616 | 0.550774742 | 0.549925484 | 0.732240437 |
| 19473 | 0.424425826 | 0           | 0.410980779 | 0           | 0.912191827 |
| 19474 | 0.499489602 | 0.314528594 | 0.652113046 | 0.098531685 | 0.242916023 |
| 19648 | 0.608688888 | 0.449929304 | 0.626810778 | 0.511082244 | 0.627374752 |
| 19649 | 0.673780393 | 0.516435354 | 0.705962521 | 0.771658145 | 0.929827124 |
| 19651 | 0.763938883 | 0.558191048 | 0.763460619 | 0.615228426 | 0.689155515 |
| 19654 | 0.561120296 | 0.064135454 | 0.575901974 | 0.119548486 | 0.412006157 |
| 19657 | 0.718432416 | 0.546866953 | 0.738430671 | 0.884291845 | 0.825236052 |
| 19662 | 0.597215207 | 0.417430859 | 0.674982979 | 0.630458515 | 0.610917031 |
| 19678 | 0.772847682 | 0.665784531 | 0.774578082 | 0.916595527 | 0.861960048 |
| 19681 | 0.635016934 | 0.427510002 | 0.812722721 | 0.544818061 | 0.622975805 |
| 19684 | 0.668460332 | 0.517933804 | 0.672272998 | 0.602825093 | 0.656418779 |

|       |             |             |             |             |             |
|-------|-------------|-------------|-------------|-------------|-------------|
| 19716 | 0.591899818 | 0           | 0.583201444 | 0.193371932 | 0.397006548 |
| 19722 | 0.669128912 | 0.482497828 | 0.640594222 | 0.759926414 | 0.707496551 |
| 19723 | 0           | 0.453570804 | 0           | 0.679935219 | 0.677958585 |
| 19725 | 0.621407405 | 0.512241055 | 0.646577886 | 0.718560368 | 0.684871312 |
| 19726 | 0.673159298 | 0.46105919  | 0.67466796  | 0.562911042 | 0.516744548 |
| 19728 | 0.752521465 | 0.459302647 | 0.791908815 | 0.596397193 | 0.611979886 |
| 19731 | 0.639518821 | 0.478710211 | 0.718976632 | 0.850029856 | 0.70139176  |
| 19749 | 0.722591808 | 0.538153846 | 0.85489693  | 0.743846154 | 0.791384615 |
| 19750 | 0.686160949 | 0.383919891 | 0.740877243 | 0.631278761 | 0.568442543 |
| 19755 | 0.658335784 | 0.362576228 | 0.732407135 | 0.560072751 | 0.575906708 |
| 19756 | 0.710640263 | 0.687634371 | 0.725448877 | 0.807476247 | 0.91545877  |
| 19758 | 0.802454745 | 0.504230118 | 0.728743829 | 0.560067682 | 0.644331641 |
| 19761 | 0.688866207 | 0.40240804  | 0.610240009 | 0.567417026 | 0.647055733 |
| 19771 | 0.733201913 | 0.570229035 | 0.625199228 | 0.566227177 | 0.637546004 |
| 19773 | 0.663162122 | 0.327827592 | 0.783046764 | 0.646531383 | 0.742698338 |
| 19776 | 0.916456785 | 0.525328982 | 0.859608458 | 0.721542502 | 0.670822014 |
| 19777 | 0.882590389 | 0.590370084 | 0.918716423 | 0.808166272 | 0.705758792 |
| 19779 | 0.62864547  | 0.493081569 | 0.655197847 | 0.506689091 | 0.517391637 |
| 19782 | 0.560852032 | 0.534745375 | 0.665184572 | 0.543243773 | 0.520494215 |
| 19783 | 0.539633704 | 0.63638985  | 0.660784257 | 0.692906574 | 0.673226644 |
| 19785 | 0.640520167 | 0.457618481 | 0.79732023  | 0.676065908 | 0.627229489 |
| 19786 | 0.672051879 | 0.477626883 | 0.688546445 | 0.597545051 | 0.642595978 |
| 19794 | 0.566692702 | 0.456479691 | 0.587665249 | 0.53997421  | 0.428970557 |
| 19795 | 0.701549955 | 0.458099397 | 0.743922837 | 0.673008942 | 0.637970472 |
| 20503 | 0.587565272 | 0.552127431 | 0.654731164 | 0.797947908 | 0.824854703 |
| 20504 | 0.68257329  | 0.534800041 | 0.798278269 | 0.539631952 | 0.533874782 |
| 20505 | 0.678917308 | 0.506490787 | 0.758008443 | 0.67849665  | 0.634422111 |
| 20507 | 0.61506368  | 0.414507772 | 0.742668228 | 0.707541739 | 0.704202648 |
| 20508 | 0.619115279 | 0.455050505 | 0.667929652 | 0.576094276 | 0.535016835 |
| 20509 | 0.750442822 | 0.631262525 | 0.782088392 | 0.779471987 | 0.746972205 |
| 20510 | 0.661442372 | 0.406980417 | 0.667600619 | 0.585281112 | 0.537744788 |
| 20515 | 0.558264067 | 0.446295542 | 0.608881393 | 0.626885312 | 0.703094657 |
| 20517 | 0.675709886 | 0.469523002 | 0.721340872 | 0.772135316 | 0.747245126 |
| 20518 | 0.696892521 | 0.479177156 | 0.734049226 | 0.647845789 | 0.549881321 |
| 20520 | 0.708564775 | 0.488063416 | 0.806829678 | 0.684763573 | 0.607337082 |
| 20521 | 0.772965981 | 0.596123369 | 0.698460742 | 0.809338047 | 0.745337072 |
| 20522 | 0.627978607 | 0.441043303 | 0.76378874  | 0.516736968 | 0.49421462  |
| 20524 | 0.646189421 | 0.455180768 | 0.747124    | 0.66371599  | 0.567275438 |
| 20525 | 0.736199377 | 0.436300665 | 0.926978193 | 0.609847421 | 0.616587101 |
| 20527 | 0.855782313 | 0.53125292  | 0.872216823 | 0.736989629 | 0.748108007 |
| 20528 | 0.737447276 | 0.472135471 | 0.931665415 | 0.601013256 | 0.581303352 |
| 20531 | 0.607626799 | 0.419089976 | 0.675798129 | 0.685939104 | 0.566769301 |
| 20534 | 0.869490503 | 0.523220951 | 0.947788889 | 0.751024904 | 0.638499663 |

|       |             |             |             |             |             |
|-------|-------------|-------------|-------------|-------------|-------------|
| 20535 | 0.69401443  | 0.518581081 | 0.657294807 | 0.880255255 | 0.673986486 |
| 20537 | 0.624354209 | 0.44793577  | 0.78820219  | 0.599462037 | 0.562171415 |
| 20758 | 0.60389009  | 0.291725768 | 0.609138623 | 0.570212766 | 0.620330969 |
| 20765 | 0           | 0.514385251 | 0.617666632 | 0.795680099 | 0.827718097 |
| 20810 | 0.969783313 | 0.573164201 | 0.881394792 | 0.866235295 | 0.768281614 |
| 20812 | 0.985188546 | 0.483674776 | 1.015798884 | 0.761363636 | 0.747119078 |
| 100 0 | 0.474827631 | 0           | 0.534885738 | 0.331746032 | 0.434920635 |
| 101 0 | 0.621686799 | 0.545918114 | 0.680491301 | 0.811702369 | 0.849113124 |
| 102 0 | 0.588908419 | 0.458363193 | 0.648586221 | 0.577038842 | 0.629210262 |
| 103 0 | 0.656815383 | 0.647351582 | 0.683503836 | 0.710510724 | 0.732669748 |
| 104 0 | 0.714446529 | 0.65551654  | 0.770731707 | 0.738865274 | 0.708187026 |
| 105 0 | 0.582867216 | 0.597172948 | 0.60084422  | 0.900260671 | 0.790909417 |
| 106 0 | 0.682286142 | 0.534089954 | 0.683263659 | 0.646574191 | 0.555947877 |
| 107 0 | 0.638152102 | 0.470780068 | 0.647094431 | 0.637620663 | 0.579311244 |
| 108 0 | 0.53717722  | 0.185864978 | 0.603537319 | 0.473295784 | 0.580295678 |
| 109 0 | 0.647727715 | 0.303142329 | 0.566026714 | 0.494762785 | 0.661737523 |
| 110 0 | 0.570038627 | 0.471849234 | 0.704759128 | 0.802355713 | 0.60753828  |
| 111 0 | 0.572225481 | 0.492319579 | 0.657703416 | 0.697379488 | 0.728081327 |
| 112 0 | 0.614281206 | 0.39206244  | 0.561717728 | 0.772283365 | 0.74871452  |
| 113 0 | 0.571901345 | 0.255520505 | 0.591513969 | 0.593410445 | 0.638626008 |
| 114 0 | 0.639110901 | 0.255175009 | 0.675242374 | 0.508844562 | 0.608957471 |
| 115 0 | 0.587050514 | 0.418083856 | 0.604831658 | 0.632995298 | 0.550639714 |
| 116 0 | 0.547435565 | 0.543921293 | 0.567219272 | 0.508315765 | 0.460763645 |
| 117 0 | 0.681285197 | 0.443837209 | 0.702233588 | 0.549883721 | 0.502209302 |
| 118 0 | 0.50117013  | 0           | 0.549960996 | 0.611692845 | 0.629144852 |
| 119 0 | 0.618375247 | 0.51828125  | 0.608126549 | 0.798161171 | 0.67328125  |
| 120 0 | 0.548909465 | 0.271324635 | 0.558836416 | 0.447606609 | 0.595588413 |
| 121 0 | 0.632140524 | 0.203464394 | 0.605973724 | 0.456420126 | 0.459444597 |
| 122 0 | 0.543772696 | 0.04387292  | 0.480861714 | 0.295007564 | 0.712556732 |
| 123 0 | 0.527775695 | 0.175645756 | 0.542356998 | 0.650184502 | 0.619926199 |
| 124 0 | 0.696044251 | 0.504264467 | 0.771848158 | 0.703319941 | 0.610277014 |
| 125 0 | 0.58425419  | 0.505077031 | 0.638162093 | 0.639880952 | 0.538340336 |
| 126 0 | 0.741506401 | 0.548370686 | 0.745367548 | 1.150828714 | 0.857257611 |
| 127 0 | 0.715253677 | 0.478202995 | 0.730237426 | 0.627870216 | 0.684442596 |
| 128 N | 0           | 0.459582168 | 0           | 0.681059248 | 0.827788526 |
| 129 0 | 0.668573561 | 0.538174177 | 0.59041164  | 0.729161802 | 0.656549148 |
| 130 0 | 0.740565932 | 0.566743531 | 0.782437687 | 0.678708686 | 0.671449312 |
| 131 0 | 0.61272537  | 0.533598266 | 0.678666291 | 0.719894027 | 0.725794798 |
| 132 0 | 0.652073949 | 0.481057616 | 0.748850413 | 0.590370955 | 0.571132597 |
| 133 0 | 0.554557271 | 0.544084998 | 0.613276173 | 0.783539486 | 0.746907707 |
| 134 0 | 0.737344657 | 0.604271645 | 0.738939268 | 0.88281926  | 0.879784445 |
| 136 0 | 0.630538414 | 0.485619206 | 0.658848302 | 0.734490135 | 0.75136677  |
| 137 0 | 0.495719773 | 0.441597338 | 0.567192355 | 0.735440932 | 0.721464226 |

|       |             |             |             |             |             |
|-------|-------------|-------------|-------------|-------------|-------------|
| 138 0 | 0.626666382 | 0.373922648 | 0.651106065 | 0.655831474 | 0.698369157 |
| 139 0 | 0.674990191 | 0.509429429 | 0.716551763 | 0.80954955  | 0.821441441 |
| 140 0 | 0.940543903 | 0.420154102 | 1.009924162 | 0.673289016 | 0.712720955 |
| 141 0 | 0.651394592 | 0.486823289 | 0.696927651 | 0.916036772 | 0.86741573  |
| 142 0 | 0.841544145 | 0.513391821 | 0.63989785  | 0.69609618  | 0.883071067 |
| 143 0 | 0.616775634 | 0.408063198 | 0.630106841 | 0.64233179  | 0.683192591 |
| 145 0 | 0.729570345 | 0.562877979 | 0.637061759 | 0.671824973 | 0.829242263 |
| 148 0 | 0.673608551 | 0.553380783 | 0.647207888 | 0.792170819 | 0.753736655 |
| 149 0 | 0.687391835 | 0.503370215 | 0.727684988 | 0.822713977 | 0.822332443 |
| 150 0 | 0.642857143 | 0.427027027 | 0.758535036 | 0.444698545 | 0.446985447 |
| 151 0 | 0.577657452 | 0.238033495 | 0.594186378 | 0.726580227 | 0.734683955 |
| 152 N | 0           | 0.590017303 | 0           | 0.770736509 | 0.793692293 |
| 155 0 | 0.697966919 | 0.455527847 | 0.695511716 | 0.647963425 | 0.717788861 |
| 156 0 | 0.608559127 | 0.432411067 | 0.661357677 | 0.832147563 | 0.766798419 |
| 157 0 | 0.692173534 | 0.548648649 | 0.764006976 | 0.885135135 | 0.737714988 |
| 158 0 | 0.575220388 | 0.326574946 | 0.604103222 | 0.604634323 | 0.536929761 |
| 159 0 | 0.772752809 | 0.467425432 | 0.813623596 | 0.731161695 | 0.821428571 |
| 160 0 | 0.685405891 | 0.630798874 | 0.723627373 | 0.803517613 | 0.82970209  |
| 231 0 | 0.619856235 | 0.49157003  | 0.599819426 | 0.728760589 | 0.713792253 |
| 232 0 | 0.653463945 | 0.615450443 | 0.713145154 | 0.845806753 | 0.90508791  |
| 233 0 | 0.602860866 | 0.442486383 | 0.703518679 | 0.597564883 | 0.633771227 |
| 234 0 | 0.595764185 | 0.395857757 | 0.751688531 | 0.500586166 | 0.513872606 |
| 235 0 | 0.591927294 | 0.311449963 | 0.693369459 | 0.550127831 | 0.498995617 |
| 236 0 | 0.618688593 | 0.446013124 | 0.656980023 | 0.650361238 | 0.690594552 |
| 237 0 | 0.657101953 | 0.403956605 | 0.641841055 | 0.771818342 | 0.717081472 |
| 238 0 | 0.568913771 | 0.338314486 | 0.585276463 | 0.370355412 | 0.372778675 |
| 239 0 | 0.684754522 | 0.488757278 | 0.774706255 | 0.726962457 | 0.699056414 |
| 240 0 | 0.624422442 | 0.690453686 | 0.651797811 | 1.030245747 | 1.052693762 |
| 242 0 | 0.698517705 | 0.680331444 | 0.657589898 | 0.85662887  | 0.889991278 |
| 243 0 | 0.661387452 | 0.649856105 | 0.768298183 | 0.905029464 | 1.004933534 |
| 244 0 | 0.641496707 | 0.49156939  | 0.621339576 | 0.530912235 | 0.559014267 |
| 245 0 | 0.633553429 | 0.635172999 | 0.703056129 | 0.708504599 | 0.771674143 |
| 246 0 | 0.585263806 | 0.474978796 | 0.523857868 | 0.57902177  | 0.706813684 |
| 247 0 | 0.652569369 | 0.333723653 | 0.573448459 | 0.532786885 | 0.798302108 |
| 249 0 | 0.609615651 | 0.22980063  | 0.574927154 | 0.125918153 | 0.44910808  |
| 250 0 | 0.641211638 | 0.541124633 | 0.645237146 | 0.63701217  | 0.75472094  |
| 251 0 | 0.53663404  | 0.314144737 | 0.521761855 | 0.030153509 | 0.233552632 |
| 252 0 | 0.694884075 | 0.453690037 | 0.672555425 | 0.669372694 | 0.631549815 |
| 253 0 | 0.705905564 | 0.434260775 | 0.675829716 | 0.593289689 | 0.698781851 |
| 254 0 | 0.608814103 | 0.457110179 | 0.550520833 | 0.388867709 | 0.558520778 |
| 255 0 | 0.607658628 | 0.425045078 | 0.586257756 | 1.288705997 | 1.234036138 |
| 256 0 | 0.58173924  | 0.432349766 | 0.640762648 | 0.761099313 | 0.743928179 |
| 257 0 | 0.605266002 | 0.462601995 | 0.689514822 | 0.739202376 | 0.770398912 |



|       |             |             |             |             |             |
|-------|-------------|-------------|-------------|-------------|-------------|
| 258 0 | 0.530030504 | 0.32593985  | 0.634620104 | 0.284210526 | 0.6         |
| 259 0 | 0.596002988 | 0.336596233 | 0.549943967 | 0.458718693 | 0.55714575  |
| 260 0 | 0.523982454 | 0.386693017 | 0.553538041 | 0.578392622 | 0.655467721 |
| 261 0 | 0.66760903  | 0.392083333 | 0.63172993  | 0.501041667 | 0.570625    |
| 262 N | 0           | 0.421440482 | 0.63005371  | 0.549090727 | 0.585008757 |
| 263 0 | 0.629009332 | 0.284649776 | 0.530066127 | 0.258320914 | 0.420765027 |
| 264 0 | 0.565417105 | 0.364113326 | 0.588384133 | 0.390346275 | 0.51381602  |
| 265 0 | 0.658123721 | 0.46703221  | 0.647456257 | 0.664806801 | 0.707726067 |
| 96 0. | 7.06427E+14 | 0.542093387 | 0.759646545 | 0.71003298  | 0.712549905 |
| 97 0. | 6.90029E+14 | 0.574014425 | 0.70177373  | 0.71360549  | 0.632413697 |
| 98 0. | 6.37396E+14 | 0.440829038 | 0.724916988 | 0.651632302 | 0.609428694 |
| 99 0. | 7.82804E+14 | 0.708369263 | 0.853407509 | 0.802745042 | 0.815823513 |
